# 1 Drug Screening Platform Using Human Induced Pluripotent Stem 2 Cell-Derived Atrial Cardiomyocytes and Optical Mapping

3 Running Title: hiPSC-derived atrial myocyte-based drug platform

4 Marvin G. Gunawan<sup>1,2,6</sup>, Sarabjit S. Sangha<sup>1,2,6</sup>, Sanam Shafaattalab<sup>1,2,5,6</sup>, Eric Lin<sup>1</sup>,  
5 Danielle A. Heims-Waldron<sup>5</sup>, Vassilios J. Bezzerides<sup>5</sup>, Zachary Laksman<sup>3,4</sup>, and Glen F.  
6 Tibbits<sup>1,2,\*</sup>

7 <sup>1</sup> Molecular Cardiac Physiology Group, Departments of Biomedical Physiology and Kinesiology  
8 and Molecular Biology and Biochemistry, Simon Fraser University, 8888 University Drive,  
9 Burnaby, BC, V5A 1A6, Canada

10 <sup>2</sup> Tibbits Research Team, Cellular and Regenerative Medicine Centre, BC Children's Hospital  
11 Research Institute, 950 West 28th Avenue, Vancouver, BC, V5Z 4H4, Canada

12 <sup>3</sup> Division of Cardiology, Faculty of Medicine, University of British Columbia, 317 – 2194 Health  
13 Sciences Mall, Vancouver, BC, V6T 1Z2, Canada

14 <sup>4</sup> Centre for Heart and Lung Innovation, St. Paul's Hospital, 1081 Burrard St, Vancouver, BC,  
15 V6Z 1Y6, Canada

16 <sup>5</sup> Department of Cardiology, Boston Children's Hospital, 300 Longwood Ave., Boston, MA,  
17 02115, USA

18 <sup>6</sup> These authors contributed equally to this article; \*Corresponding author  
19

## 20 Author Contributions

21 Marvin G. Gunawan and Sarabjit S. Sangha: conception and design, collection and assembly of  
22 data, data analysis and interpretation, manuscript writing; Sanam Shafaattalab: experimental  
23 design support, data interpretation, manuscript writing; Eric Lin: designed and built the optical  
24 mapping system (hardware and software); Danielle A Heims-Waldron: cell culture, Vassilios J.  
25 Bezzerides: data collection, data analysis and interpretation, manuscript writing; Zachary  
26 Laksman and Glen F. Tibbits: conception of study, manuscript writing support and review, data  
27 interpretation, financial support.

## 28 Funding Information

29 This work was financially supported by the Canadian Institutes of Health Research (G.F.T), the  
30 Canada Innovation Fund (G.F.T), and the Stem Cell Network (G.F.T and Z.L.).  
31

## 32 Correspondence

33 Dr. Glen F. Tibbits

34 [tibbits@sfu.ca](mailto:tibbits@sfu.ca)

35 Room 2084

36 British Columbia Children's Hospital Research Institute

37 950 West 28<sup>th</sup> Avenue, Vancouver

38 British Columbia, V5Z 4H4, Canada  
39

40 **Keywords:** drug screening; atrial fibrillation; cardiomyocyte subtype; atrial differentiation;  
41 human induced pluripotent stem cells

1 **ABSTRACT**

2           Current drug development efforts for the treatment of atrial fibrillation (AF) are hampered  
3 by the fact that many preclinical models have been unsuccessful in reproducing human cardiac  
4 atrial physiology and its response to medications. In this study, we demonstrated an approach  
5 using human induced pluripotent stem cell-derived atrial and ventricular cardiomyocytes  
6 (hiPSC-aCMs and hiPSC-vCMs, respectively) coupled with a sophisticated optical mapping  
7 system for drug screening of atrial-selective compounds *in vitro*.

8           We optimized differentiation of hiPSC-aCMs by modulating the WNT and retinoid  
9 signalling pathways. Characterization of the transcriptome and proteome revealed that retinoic  
10 acid pushes the differentiation process into the atrial lineage and generated hiPSC-aCMs.  
11 Functional characterization using optical mapping showed that hiPSC-aCMs have shorter action  
12 potential durations and faster Ca<sup>2+</sup> handling dynamics compared to hiPSC-vCMs. Furthermore,  
13 pharmacological investigation of hiPSC-aCMs captured atrial-selective effects by displaying  
14 greater sensitivity to atrial-selective compounds 4-aminopyridine, AVE0118, UCL1684, and  
15 vernakalant when compared to hiPSC-vCMs.

16           These results established that a model system incorporating hiPSC-aCMs combined  
17 with optical mapping is well-suited for pre-clinical drug screening of novel and targeted atrial  
18 selective compounds.

## 1 INTRODUCTION

2           The advent of human induced pluripotent stem cell-derived cardiomyocytes (hiPSC-  
3 CMs) has revolutionized the field of cardiac research. It has enabled the study of cardiac  
4 diseases in a patient-specific and human-relevant *in vitro* model system which provides a  
5 unique opportunity for clinical translation<sup>1</sup>. Furthermore, the ability to differentiate chamber-  
6 specific cardiomyocytes allows for a more precise study of cardiac disease physiology and  
7 pharmacology.

8           The cardiomyocytes of the lower (ventricles) and upper (atria) chambers have distinct  
9 characteristics that arise from differential developmental pathways. Previous work *in vivo* has  
10 shown that the expression patterns of retinoic acid and retinaldehyde dehydrogenase 2  
11 (RALDH2) are important determinants of the atrial fate<sup>2-5</sup>. These results were later recapitulated  
12 in a pivotal study by Lee & Protze et al.<sup>6</sup> who determined that atrial cardiomyocytes (aCMs)  
13 differentiated from human embryonic stem cells (hESCs) originate from a unique mesoderm  
14 characterized by robust RALDH2 expression. This study established an atrial differentiation  
15 protocol that included the addition of retinoic acid. Retinoic acid has also been utilized to  
16 selectively differentiate hESCs and hiPSCs into aCMs in other studies<sup>6-10</sup>.

17           The distinct properties of the atrial and ventricular cardiomyocytes are determined by the  
18 differential expression of unique sets of ion channels and other proteins that optimize their  
19 specific function. Drugs that target atrial ion channels selectively can therefore produce  
20 differences in pharmacological function in the two chambers. This atrial-selective pharmacology  
21 is of utmost interest in the study and treatment of atrial-specific diseases such as atrial fibrillation  
22 (AF), which is the most common heart rhythm disorder. Investigating atrial-selective  
23 pharmacology can assist and guide novel cardiac drug development as well as improving both  
24 safety and efficacy by avoiding potential toxic electrophysiologic effects on the ventricular  
25 chambers.

26           The differential pharmacology of stem cell-derived aCMs was studied previously by  
27 Laksman et al.<sup>7</sup> who showed that flecainide can rescue the AF phenotype in a dish. Other  
28 studies have also studied the selective pharmacological effects of agents on hiPSC-derived  
29 aCMs but have largely focused on being proof-of-concept studies using limited number of test  
30 compounds and standard measurement systems that are low in throughput<sup>9,10</sup>. With a focus on  
31 translation, a pre-clinical model platform that characterizes pharmacological activity must  
32 capture the main cardiac functional signatures that most closely mimic and predict human

1 cardiac physiology and drug responses. As such, we established in this study an *in vitro* assay  
2 platform by combining hiPSC-derived atrial cardiomyocytes (hiPSC-aCMs) and high-content  
3 optical mapping, a non-invasive all-optical system that simultaneously measures membrane  
4 potential ( $V_m$ ) and  $Ca^{2+}$  transients at a high-resolution in a monolayer tissue format.

5         We first demonstrate a selective hiPSC-aCM differentiation protocol by modifying the  
6 well characterized GiWi protocol<sup>11</sup> through the controlled introduction of retinoic acid. The  
7 recapitulation of the human atrial phenotype of the hiPSC-aCMs was validated with assays that  
8 measure the expression of gene transcripts and proteins, as well as functional signatures. We  
9 then demonstrate the utility of our platform as an atrial-selective drug screening tool by using  
10 existing clinical and experimental drugs. The model established in this study adds to our current  
11 understanding of the utility of stem cell derived cardiomyocytes in pre-clinical and translational  
12 research focused on screening new pharmacological agents.

13

## 1 METHODS AND MATERIALS

2 A detailed Methods section is available in the Supplemental Information.

### 3 Maintenance and Expansion of hiPSCs

4 hiPSCs (WiCell, IMR90-1) were maintained and expanded in mTeSR1 medium and  
5 feeder-free culture using 6-well plates coated with Matrigel. Using Versene (EDTA), hiPSCs  
6 were passaged every 4 days or ~85% confluency at 1:15 ratio. Passaged hiPSCs were cultured  
7 with mTeSR1 supplemented with 10  $\mu$ M Y27632 for the first 24 hours and the mTeSR1 was  
8 exchanged daily during cell culture maintenance.

### 9 Directed Differentiation of hiPSCs into Atrial and Ventricular Subtypes

10 hiPSC-derived ventricular cardiomyocytes were differentiated by employing a modified  
11 GiWi protocol<sup>11</sup> that we previously described<sup>12</sup>. In brief, hiPSCs were seeded at a density of  
12 87,500 cells/cm<sup>2</sup>. At day 0, differentiation was initiated using 12  $\mu$ M CHIR99021. At day 3, the  
13 cells were incubated with 5  $\mu$ M IWP-4. At day 5, the media were refreshed with RPMI-1640  
14 supplemented with B27 minus insulin. At day 7, the medium was replaced with cardiomyocyte  
15 maintenance media (RPMI-1640 supplemented with B27 with insulin). Thereafter,  
16 cardiomyocyte maintenance medium was replaced every 4 days. For the atrial differentiation  
17 protocol, retinoic acid (RA) addition was first optimized in pilot studies (Figure S2 & S3) and  
18 determined to be 0.75  $\mu$ M RA every 24 hours from days 4-6.

### 19 Flow Cytometry

20 hiPSC-aCMs and hiPSC-vCMs at Day 20-30 post-differentiation were dissociated into  
21 single cells as described in the Supplemental Information. The harvested cells were fixed in  
22 4.1% PFA solution for 25 min and then washed and permeabilized in Saponin/FBS. Cells were  
23 subsequently incubated overnight in primary mouse-cTnT (1:2000) and rabbit-MLC2V (1:1000)  
24 antibodies. Subsequently, the cells were washed and incubated for one hour in secondary goat  
25 anti mouse Alexa-488 (1:500) and goat anti rabbit Alexa-647 (1:2000) antibodies, respectively.  
26 Cells were then washed and suspended in PBS for analysis. All analyses were performed using  
27 the BDJAZZ Fluorescence Activated Cell Sorter.

### 28 mRNA Expression Profiling

29 Gene expression profiling was conducted using multiplexed NanoString and real time  
30 quantitative PCR (qPCR). Pooled total RNA was used in both assays. The extracted RNA was

1 reverse transcribed into cDNA which was used in the qPCR assay. Oligonucleotide sequences  
2 are described in Table S7. The multiplexed mRNA profiling was conducted using a NanoString  
3 Technologies (Seattle, WA) platform with a custom code set containing 250 gene probes.  
4 Analysis was performed on the Nanostring Sprint instrument and nSolver analysis software with  
5 the Advanced Analysis module.

## 6 Atrial Natriuretic Peptide Measurement

7 The levels of atrial natriuretic peptide (ANP) of hiPSC-aCMs and -vCMs were measured  
8 by a competitive enzyme-linked immunosorbent assay (ELISA) using a commercially available  
9 kit (Invitrogen, CA). The assay was conducted according to the manufacturer's protocol and was  
10 measured using a spectrophotometric plate reader.

## 11 Cardiomyocyte Enrichment

12 For cardiac enrichment, hiPSC-aCMs and -vCMs at day 20-30 post-differentiation were  
13 dissociated into single cells which were then enriched using a MidiMACS PSC-derived  
14 Cardiomyocyte Isolation Kit (Miltenyi Biotec, Germany) according to the manufacturer's  
15 protocol. Enriched hiPSC-CMs were seeded on Matrigel-coated 24-well plates at a seeding  
16 density of 600,000 cells per well.

## 17 Patch-clamp Recordings

18 Single hiPSC-aCMs and -vCMs were plated on gelatin (0.1%) and Geltrex (1:10) at  
19 30,000 cells per well. After 48 hours in culture, glass electrodes were used to achieve the  
20 whole-cell configuration with single hiPSC-CMs and only cells with gigaohm seals were used for  
21 further analysis. The formulation for internal and external recordings solutions are outlined in the  
22 Supplemental Information. Current recordings were performed using an Axon Instruments 700B  
23 amplifier and digitized at 20 KHz. All recordings were performed at 33-35 °C as maintained. For  
24 pacing at 1 Hz, gradually increasing amounts of current were injected with a 1 ms pulse width  
25 until reliable action potentials (APs) were triggered. The maximal upstroke velocity was  
26 determined by calculating the maximum derivative and the resting membrane potential was  
27 measured during a 5 second epoch without spontaneous activity one minute after break-in.  
28 Further details on data analysis are found in the Supplemental Information.

## 29 Optical Mapping

30 Optical mapping recordings were performed on enriched monolayers of hiPSC-aCMs  
31 and -vCMs cultured in a 24-well plate format at Day 45-60 post-differentiation. Imaging

1 experiments were conducted using Ca<sup>2+</sup> Tyrode's solution (formulation found in Supplemental  
2 Information). The hiPSC-CMs were loaded with RH-237, blebbistatin, and Rhod-2AM  
3 sequentially before imaging as described<sup>12,13</sup>. Both RH-237 and Rhod-2AM were excited by 530  
4 nm LEDs. Images were acquired at a frame rate of 100 frames/second by a sCMOS camera  
5 (Orca Flash 4.0 V2, Hamamatsu Photonics, Japan) equipped with an optical splitter. The cells  
6 were paced using programmable stimulation. Data collection, image processing, and initial data  
7 analysis were accomplished using custom software. The multi-well optical mapping system was  
8 custom engineered in the lab based on a system as described previously<sup>17</sup>. Further details are  
9 found in the Supplemental Information.

## 10 Pharmacological Analyses

11 The drugs used in this study are listed Table S8. Drug stocks were further diluted in Ca<sup>2+</sup>  
12 Tyrode's solution prior to pharmacological testing with the final DMSO concentration in the  
13 experimental solution not exceeding 0.03% (v/v). Drug effects were studied in serum-free  
14 conditions (i.e. Ca<sup>2+</sup> Tyrode's and drug only) at four doses by sequentially increasing the drug  
15 concentration in the same well with recordings at 20-minute intervals.

## 16 Statistical Analysis

17 Further details on data and statistical analysis can be found in the Supplemental  
18 Information. Unpaired t-tests were conducted to compare two groups (i.e. hiPSC-aCMs vs.  
19 hiPSC-vCMs) in the analysis of qPCR, ELISA, patch clamp recordings, and optical mapping  
20 (baseline condition and normalized drug effects). Analysis of dose-dependent effects were  
21 performed using one-way ANOVA and Dunnett's post-hoc test. All data are presented as mean  
22 ± SEM unless noted otherwise. Significance level for all statistical analysis was set at p < 0.05  
23 with the following notation: \*p < 0.05, \*\*p < 0.01, \*\*\*p < 0.001.

24



## 1 RESULTS

### 2 RA Treatment Drives Cardiac Differentiation into Atrial Phenotype

3 We first optimized the atrial differentiation protocol by altering the concentration and  
4 timing of retinoic acid (RA) based on the molecular signatures of an atrial phenotype as  
5 measured by qPCR and flow cytometry (Figures S2 & S3). Higher dose of RA reduced cardiac  
6 differentiation efficacy defined by the decrease in the cTnT<sup>+</sup> proportion of the total cell  
7 population as measured by flow cytometry (Figure S2A). The finalized protocol to generate  
8 hiPSC-aCMs included the addition of RA at 0.75  $\mu$ M every 24 hours on days 4, 5, and 6 (Figure  
9 1A) which was found as a balance between sufficiently driving atrial differentiation as defined by  
10 decreased ventricular marker myosin light chain 2 – ventricular paralog (MLC-2v) while having  
11 no impact cardiac differentiation efficacy (Figure S2 & S3).

12 Compared to hiPSC-vCMs, hiPSC-aCMs were found to have no significant difference in  
13 the pan cardiac phenotype. Expression of the pan cardiac transcript *NKX 2.5* measured by  
14 qPCR was similar between hiPSC-aCMs and -vCMs (Figure 1B), as was cardiac troponin T  
15 (cTnT) protein expression measured by flow cytometry (Figures 1C and S1). The protein  
16 expression of MLC-2v was reduced in hiPSC-aCMs compared to hiPSC-vCMs ( $8.0 \pm 1.1$  % vs.  
17  $57.0 \pm 0.5$  %;  $p < 0.05$ ) (Figure 1C). Furthermore, hiPSC-aCMs displayed higher concentrations  
18 (increased by 91%) of atrial natriuretic peptide (ANP) at  $65 \pm 2$  compared to  $34 \pm 6$  ng/mL in  
19 hiPSC-vCMs as measured by ELISA ( $p < 0.05$ ).

20 The qPCR assay revealed that atrial-specific transcripts such as atrial natriuretic peptide  
21 (*NPPA*), connexin 40 (*GJA5*), the L-type calcium channel  $Ca_v1.3$  (*CACNA1D*), and the K<sup>+</sup>  
22 channels  $K_v1.5$  (*KCNA5*) and  $K_{ir}3.1$  (*KCNJ3*) transcripts were all expressed at a significantly  
23 higher levels in hiPSC-aCMs compared to hiPSC-vCMs ( $p < 0.05$ , Figure 1B). Another ventricular  
24 marker, *IRX4*, also had decreased expression in hiPSC-aCMs (Figure 1B). Furthermore,  
25 consistent with previous studies<sup>8–10,14,15</sup>, hiPSC-aCMs started beating at day 10 or earlier and  
26 exhibited an increased beating frequency relative to hiPSC-vCMs, which started beating around  
27 day 10-12 post-differentiation.

### 28 Gene Expression Analysis of hiPSC-aCMs

29 We performed an extensive gene expression analysis of hiPSC-aCMs and -vCMs using  
30 NanoString technology in which each mRNA copy was digitally counted for accurate and  
31 sensitive detection of gene expression<sup>16</sup>. Five independent differentiation batches of each



1 cardiac subtype were included in the analysis. The unsupervised hierarchical clustering analysis  
2 showed clear grouping of hiPSC-aCM samples that were segregated relative to hiPSC-vCMs  
3 (Figure 2A). The gene expression profile of the hiPSC-vCM samples were more variable with 2  
4 samples closer in distance to the hiPSC-aCMs while 3 samples displayed clear segregation  
5 (Figure 2A). The overall difference in global gene expression and lineage between hiPSC-aCMs  
6 and -vCMs was also captured in the principal component analysis (PCA, Figure S4A). Out of the  
7 250 transcripts analyzed, 200 genes were detected above background noise defined by a  
8 threshold of 50 raw digital counts as determined by the negative controls of the assay. In the  
9 hiPSC-aCMs, 14 and 27 genes were significantly upregulated and downregulated, respectively  
10 (Figure 2C). As expected, hiPSC-aCMs displayed significantly higher expression profiles of  
11 atrial-specific markers including atrial-specific K<sup>+</sup> channel K<sub>v</sub>1.5 (*KCNA5*) and transcription  
12 factors (*NR2F2* and *TBX18*) (Figure 2C). Meanwhile, hiPSC-vCMs displayed higher expression  
13 of ventricular-specific genes such as those encoding for contractile proteins *MYL2*, *MYH7*, and  
14 the L-type Ca<sup>2+</sup> channel isoform Ca<sub>v</sub>1.2 (*CACNA1C*) (Figure 2C). The genes encoding for the  
15 proteins in the sarcoplasmic reticulum complex such as *TRDN*, *CASQ2*, and *RYR2* were  
16 expressed in significantly lower amounts in the hiPSC-aCMs samples (Figure 2C). Meanwhile,  
17 pan-cardiac markers *NKX2-5* and *TNNT2* were expressed at similar levels in both hiPSC-aCMs  
18 and -vCMs, further corroborating the efficacy of the differentiation protocol (Figure S4B).

### 19 Functional Phenotyping of hiPSC-derived Atrial Cardiomyocytes

20 We compared the electrophysiological characteristics of the differentiated hiPSC-aCMs  
21 and -vCMs using whole-cell patch clamp. Confirming our observations in tissue culture, the  
22 spontaneous beating rates were higher in the single hiPSC-aCMs than in -vCMs (Figure A and  
23 C). Whole cell current clamp recordings demonstrated the ventricular-like action potential (AP)  
24 morphology of hiPSC-vCMs with a clear and prolonged plateau phase while the AP of the  
25 hiPSC-aCMs displayed atrial-like morphology with a shorter action potential duration (APD) and  
26 a lack of prolonged plateau phase at both spontaneous beating rates (Figure B & D, left panel)  
27 and paced at 1 Hz (Figure B & D, right panel). No statistical differences were observed in the  
28 resting membrane potential and the maximum upstroke velocity of hiPSC-aCMs and -vCMs.  
29 The APD at 50% (APD<sub>50</sub>) and 90% (APD<sub>90</sub>) of the peak voltage were significantly shorter in  
30 hiPSC-aCMs than -vCMs at both spontaneous beating rates (APD<sub>50</sub>: 157 ± 16 ms vs. 349 ± 35  
31 ms, p-value < 0.005; APD<sub>90</sub>: 249 ± 34 ms vs. 484 ± 30 ms, p-value < 0.005) and paced at 1 Hz  
32 (APD<sub>50</sub>: 157 ± 16 ms vs. 264 ± 44 ms, p-value < 0.05; APD<sub>90</sub>: 242 ± 22 ms vs. 341 ± 48 ms, p-  
33 value < 0.05).

1 We further assessed the functional properties of hiPSC-aCMs and -vCMs using optical  
2 mapping with simultaneous measurement of APs and calcium transients (CaT). Like the patch  
3 clamp recordings, optical membrane voltage measurements revealed similar atrial-like and  
4 ventricular-like AP morphology in the hiPSC-aCMs and -vCMs, respectively (Figure 4A). AP  
5 and CaT durations were quantified at early, mid, and late repolarization (APD<sub>20</sub>, APD<sub>50</sub>, and  
6 APD<sub>80</sub>) and Ca<sup>2+</sup> decay (CaTD<sub>20</sub>, CaTD<sub>50</sub>, and CaTD<sub>80</sub>), respectively. These stages reflect  
7 different phases of ionic currents across the plasma membrane and the extrusion of Ca<sup>2+</sup>  
8 handling mechanics.

9 For these experiments, both hiPSC-aCMs and -vCMs were paced at 1 Hz. All measured  
10 levels of the APD were significantly shorter in hiPSC-aCMs compared to hiPSC-vCMs (APD<sub>20</sub>:  
11 84 ± 8 ms vs. 127 ± 6 ms, p < 0.05; APD<sub>50</sub>: 131 ± 12 ms vs. 191 ± 8 ms, p < 0.01; APD<sub>80</sub>: 179 ±  
12 16 ms vs. 251 ± 12 ms, p < 0.05; Figure 4D). The overall CaTD of hiPSC-aCMs was  
13 significantly shorter than that of hiPSC-vCMs (CaTD<sub>20</sub>: 180 ± 12 ms vs. 266 ± 12 ms, p < 0.001;  
14 CaTD<sub>50</sub>: 282 ± 18 ms vs. 397 ± 16 ms, p < 0.001; CaTD<sub>80</sub>: 474 ± 27 ms vs. 615 ± 18 ms, p <  
15 0.001; Figure 4E). Compared to hiPSC-vCMs, hiPSC-aCMs displayed significantly faster CaT  
16 time-to-peak (hiPSC-aCMs: 116 ± 7 ms vs. hiPSC-vCMs: 246 ± 10 ms, p < 0.05) and faster  
17 decay kinetics (τ; hiPSC-aCMs: 350 ± 39 ms vs. hiPSC-vCMs: 671 ± 118 ms, p < 0.05)  
18 indicating that Ca<sup>2+</sup> handling mechanics are accelerated in hiPSC-aCMs (Figure 4F & G).

19 The direct comparison between whole-cell patch clamp and optical mapping read-outs  
20 paced at 1 Hz is shown in Figure S7. We observed no differences in the read-outs of hiPSC-  
21 aCMs at APD<sub>20</sub> (optical: 84 ± 8 ms, patch: 98 ± 12 ms) and APD<sub>50</sub> (optical: 131 ± 12 ms, patch:  
22 169 ± 19 ms). However, APD<sub>80</sub> of hiPSC-aCMs measured by patch clamp was longer than the  
23 optical APD<sub>80</sub> (253 ± 22 ms vs. 179 ± 16 ms, p < 0.05). Similarly, both APD<sub>20</sub> (216 ± 22 ms vs.  
24 127 ± 6 ms) and APD<sub>80</sub> (393 ± 62 vs. 251 ± 12 ms) of hiPSC-vCMs measured by patch clamp  
25 were longer than the comparable optical measurements. APD<sub>50</sub> of hiPSC-vCMs did not show a  
26 statistical difference between the two recording paradigms (optical: 191 ± 8 ms, patch: 308 ± 60  
27 ms).

28 Rate-dependent properties are critical in cardiac function. A variable rate protocol  
29 (Figure S6) in which the hiPSC-CMs were electrically paced with increasing frequency at every  
30 cycle was used to investigate the electrical restitution dynamics. The electrical restitution curve  
31 reflects the ability of the cardiac system to accommodate a higher pacing rate by progressive  
32 shortening of APD<sub>80</sub> and is described as APD<sub>80</sub> in relation to the diastolic interval (DI).

1 Compared to hiPSC-vCMs, the electrical restitution curve of the hiPSC-aCMs displayed a flatter  
2 portion and did not show APD<sub>80</sub> shortening at longer diastolic intervals (Figure 4F). The  
3 extensive shortening in APD<sub>80</sub> started at shorter diastolic intervals for hiPSC-aCMs (< 275 ms)  
4 compared to hiPSC-vCMs (<500 ms). The maximum slope of the restitution curve was higher in  
5 hiPSC-vCMs compared to hiPSC-aCMs ( $1.26 \pm 0.08$  vs.  $0.91 \pm 0.04$ ,  $p < 0.05$ ; Figure 4G)  
6 indicating faster kinetics of APD in response to higher pacing rate.

## 7 *In Vitro* Screening for Atrial-selective Pharmacology

8 We first established the utility of optical mapping to detect a pan-cardiac  
9 pharmacological response by using dofetilide, a strong blocker of the rapid delayed rectifier K<sup>+</sup>  
10 current ( $I_{Kr}$ )<sup>17</sup>, an ionic current expected to be present in both hiPSC-aCMs and -vCMs<sup>18</sup>.  
11 Dofetilide elicited a dose-dependent response in both hiPSC-aCMs and -vCMs. Compared to  
12 pre-drug baseline, dofetilide at 100 nM prolonged APD<sub>80</sub> of both hiPSC-aCMs from  $182 \pm 16$  ms  
13 to  $355 \pm 24$  ms (95 + 7 % prolongation) and of hiPSC-vCMs from  $238 \pm 20$  ms to  $319 \pm 45$  ms  
14 ( $34 \pm 14$  % prolongation,  $p < 0.05$ ; Table S1 & Figure 5C). The drug prolonged early-  
15 repolarization (APD<sub>20</sub>) of hiPSC-vCMs at 10 and 30 nM while having no effect on APD<sub>20</sub> of  
16 hiPSC-aCMs at all tested doses (Table S1). Additionally, CaTD<sub>50</sub> and CaTD<sub>80</sub> of both hiPSC-  
17 aCMs and -vCMs were significantly prolonged in response to dofetilide (Table S1). However,  
18 hiPSC-aCMs appeared to be more sensitive to dofetilide as the APD<sub>80</sub> was significantly  
19 prolonged at the lowest tested dose of 3 nM (from to  $182 \pm 26$  ms to  $241 \pm 26$  ms,  $p < 0.05$ ;  
20 Table S1) and displayed a larger dose-response (Figure S8).

21 Next, we demonstrated the functional differences in the ion channels of hiPSC-aCMs  
22 and -vCMs. We aimed to show that the ultra-rapid outward current ( $I_{Kur}$ ) produced by the  
23 channel K<sub>v</sub>1.5 (*KCNA5*) was functional and specific to hiPSC-aCMs, while the inward Ca<sup>2+</sup>  
24 current ( $I_{Ca,L}$ ) produced the voltage-dependent L-type Ca<sup>2+</sup> channel Ca<sub>v</sub>1.2 (*CACNA1C*) was  
25 functional and specific to hiPSC-vCMs. We used two relatively selective compounds, 4-  
26 aminopyridine (4AP) and nifedipine, to dissect the presence of functional  $I_{Kur}$  and  $I_{Ca,L}$ ,  
27 respectively. While nifedipine is also known to block Cav1.3, it has been to have a preferential  
28 effect at lower concentrations on Ca<sub>v</sub>1.2 with upwards of ~13-fold higher block on Ca<sub>v</sub>1.2 than  
29 Ca<sub>v</sub>1.3<sup>19</sup>.

30 At the highest tested dose (300 nM), nifedipine significantly decreased APD<sub>50</sub> of hiPSC-  
31 vCMs from  $170 \pm 14$  ms to  $121 \pm 16$  ms (28% shortening) and decreased CaTD<sub>50</sub> from  $357 \pm 10$   
32 ms to  $333 \pm 23$  ms (30% shortening) (Figure 5D; Table S2). We observed a trend in APD<sub>50</sub>

1 shortening of hiPSC-aCMs in response to increasing nifedipine doses, but the drug elicited a  
2 significantly stronger dose-dependent shortening in both APD and CaTD of hiPSC-vCMs  
3 compared to hiPSC-aCMs (Figure S8 & S9). Observing the percent change from pre-drug  
4 control, nifedipine induced differential response in overall APD and CaTD between hiPSC-aCMs  
5 and -vCMs at 10, 100, and 300 nM (Figure 5D).

6 In hiPSC-aCMs, 4AP prolonged APD and CaTD in a dose-dependent manner with a  
7 statistically significant change starting at 30  $\mu$ M (Figure 6A & C; Table S3). 4AP significantly  
8 prolonged early-repolarization (APD<sub>20</sub>) of hiPSC-aCMs by  $46 \pm 2\%$  and  $66 \pm 2\%$  at 50 and 100  
9  $\mu$ M, respectively (APD<sub>20</sub> at baseline:  $82 \pm 8$ , at 50  $\mu$ M:  $120 \pm 9$  ms, at 100  $\mu$ M:  $131 \pm 9$  ms,  $p <$   
10  $0.05$ ) (Figure 6C & Table S3). In contrast, 4AP prolonged APD<sub>20</sub> of hiPSC-vCMs by 23% (APD<sub>20</sub>  
11 at baseline:  $138 \pm 8$  ms, at 100  $\mu$ M:  $170 \pm 9$  ms) at the highest tested dose of 100  $\mu$ M (Figure  
12 6C & Table S3). hiPSC-aCMs showed greater change in APD to relative to pre-drug control at  
13 all concentrations of 4AP compared to hiPSC-vCMs (Table S3), This is corroborated by the  
14 steeper trend of the dose response relationship in hiPSC-aCMs (Figure S8). Additionally, the  
15 overall CaTD of hiPSC-aCMs were prolonged after exposure to 4AP at 10  $\mu$ M while the drug  
16 had a significant effect on CaTD of hiPSC-vCMs at 30  $\mu$ M (CaTD<sub>50</sub> elongation from baseline:  $68$   
17  $\pm 2\%$  vs.  $12 \pm 2\%$ ,  $p < 0.05$ ) (Table S3).

18 We then demonstrated the effectiveness of our drug screening platform in assessing the  
19 effects of experimental compounds designed to have targeted effects on atrial-specific ion  
20 channels using AVE0118 and UCL1684.

21 AVE0118 is an experimental drug that blocks  $I_{Kur}$ , the G-protein-activated  $K^+$  current  
22 ( $I_{KAch}$ ), and the transient outward  $K^+$  current ( $I_{to}$ ) at a similar dose range<sup>20</sup>. Both  $I_{Kur}$  and  $I_{KAch}$  are  
23 atrial-specific ionic currents. AVE0118 prolonged mid- and late- repolarization (APD<sub>50</sub> and  
24 APD<sub>80</sub>) of both hiPSC-aCMs and -vCMs at the two highest tested doses (3 and 10  $\mu$ M; Table  
25 S4). Similarly, AVE0118 had significant effects on CaTD<sub>50</sub> and CaTD<sub>80</sub> of hiPSC-aCMs and -  
26 vCMs at all tested doses (Table S4). However, the APD<sub>50</sub> and APD<sub>80</sub> of hiPSC-aCMs were  
27 significantly prolonged at a lower dose of 1  $\mu$ M (control:  $200 \pm 14$  ms, 1  $\mu$ M:  $244 \pm 16$  ms; Table  
28 S4). Furthermore, the atrial-selective effects of the drug were demonstrated by a larger  
29 proportional prolongation in APD<sub>50</sub> and APD<sub>80</sub> of hiPSC-aCMs compared to hiPSC-vCMs at 1, 3,  
30 and 10  $\mu$ M (APD; Figure 6D). Furthermore, AVE0118 induced a larger proportional prolongation  
31 in CaTD of hiPSC-aCMs compared to hiPSC-vCMs at all tested doses (Figure 6D). Early  
32 repolarization (APD<sub>20</sub>) of hiPSC-aCMs also displayed a large dose-dependent response (Figure

1 S8) with a proportionally larger prolongation at 10  $\mu\text{M}$  ( $63 \pm 2\%$  vs.  $43 \pm 5\%$ ,  $p < 0.05$ ; Figure  
2 6D)

3 UCL1684 is purported to be a potent direct pore blocker of the small conductance  $\text{Ca}^{2+}$   
4 activated  $\text{K}^+$  channel (SK channel)<sup>21</sup> and was expected to induce a dose-dependent atrial-  
5 selective response. In hiPSC-aCMs, UCL1684 treatment resulted in a significantly prolonged  
6  $\text{APD}_{80}$  at 3  $\mu\text{M}$  and 10  $\mu\text{M}$  (from pre-drug control:  $136 \pm 11$  ms to 3  $\mu\text{M}$ :  $188 \pm 25$  ms or 38%  
7 prolongation, and to 10  $\mu\text{M}$ :  $206 \pm 32$  ms or 49% prolongation,  $p < 0.05$ ; Figure 7C & Table S5).  
8 UCL1684 prolonged  $\text{CaTD}_{80}$  of hiPSC-aCMs at all tested doses (baseline:  $300 \pm 15$  ms, at 0.3  
9  $\mu\text{M}$ :  $372 \pm 23$  ms, at 1  $\mu\text{M}$ :  $387 \pm 33$  ms, at 3  $\mu\text{M}$ :  $413 \pm 24$  ms, at 10  $\mu\text{M}$ :  $416 \pm 39$  ms,  $p < 0.05$ ;  
10 Table S5). In contrast, UCL1684 exposure showed no statistically significant effect on overall  
11 APD and CaTD of hiPSC-vCMs. The sensitivity of hiPSC-aCMs to UCL1684 was also reflected  
12 in the dose-response relationship showing a prolongation  $\text{APD}_{80}$ , in contrast to the minimal  
13 prolongation in  $\text{APD}_{80}$  of hiPSC-vCMs (Figure S8).

14 Finally, we tested the effects of vernakalant which is a multi-ion channel blocker that  
15 blocks the fast and late inward  $\text{Na}^+$  current ( $I_{\text{Na}}$ ,  $I_{\text{NaL}}$ , respectively), the  $I_{\text{Kur}}$ , and the  $I_{\text{KAch}}$ <sup>22</sup>. The  
16 drug is used clinically for intravenous cardioversion of patients in AF<sup>23</sup> and was expected to  
17 induce an atrial-specific effect due to its  $I_{\text{Kur}}$  and  $I_{\text{KAch}}$  blocking properties.

18 Vernakalant elicited a positive dose-dependent response in both APD and CaTD of  
19 hiPSC-aCMs with minimal measurable effects on hiPSC-vCMs (Table S6; Figure S8 & S9).  
20 Vernakalant demonstrated atrial-selectivity with statistically significant differences between APD  
21 and CaTD of hiPSC-aCMs and -vCMs at doses of 3, 10, and 30  $\mu\text{M}$  (Figure 7D). Compared to  
22 APD at baseline, vernakalant at 10  $\mu\text{M}$  significantly prolonged  $\text{APD}_{20}$ ,  $\text{APD}_{50}$ , and  $\text{APD}_{80}$  of  
23 hiPSC-aCMs by 84%, 70 %, and 77%, respectively (Figure 7D). Additionally, vernakalant at 10  
24  $\mu\text{M}$  prolonged  $\text{CaTD}_{20}$ ,  $\text{CaTD}_{50}$ ,  $\text{CaTD}_{80}$  of hiPSC-aCMs by 58%, 50%, 35%, respectively  
25 (Figure 7D). At clinically relevant concentrations (30  $\mu\text{M}$ ), vernakalant greatly affected early  
26 repolarization of hiPSC-aCMs ( $\text{APD}_{20}$  prolonged by 124%; Figure 7D). At 30  $\mu\text{M}$ , vernakalant  
27 prolonged  $\text{APD}_{80}$  of hiPSC-vCM by 20% ( $\text{APD}_{80}$ :  $238 \pm 22$  ms at baseline vs.  $289 \pm 30$  ms at 30  
28  $\mu\text{M}$ ,  $p < 0.05$ ; Figure 7D & Table S6). Except for  $\text{APD}_{80}$  prolongation at 30  $\mu\text{M}$ , vernakalant had  
29 no statistically significant effect on overall APD and CaTD of hiPSC-vCMs at the lower doses  
30 (Table S6).

31

## 1 DISCUSSION

2 In this study, we were successful in efficiently differentiating hiPSCs into a monolayer of  
3 cardiomyocytes with an atrial phenotype by modifying the GiWi protocol<sup>11</sup>. We used multiple  
4 phenotypic approaches such as qPCR, digital multiplexed gene expression analysis with  
5 NanoString technology, flow cytometry, ELISA, voltage measurements with current clamp  
6 electrophysiology as well as simultaneous voltage and Ca<sup>2+</sup> transient measurements with optical  
7 mapping to demonstrate a clear and distinct atrial phenotype. Unique to our study, we  
8 completed an in-depth pharmacological analysis with simultaneous voltage and Ca<sup>2+</sup>  
9 measurements to demonstrate the differential responses of these chamber-specific  
10 cardiomyocytes, and their utility as a translational model in screening for the safety and efficacy  
11 of novel atrial-specific compounds for the treatment of AF.

12 Our observations support previous data in showing that atrial specification is in part  
13 mediated by RA<sup>6,8–10,15</sup>. In our protocol, atrial differentiation was accomplished by adding 0.75  
14 μM RA twenty-four hours after WNT inhibition, with a total exposure time of 72 hours. The  
15 generated hiPSC-aCMs showed an atrial-specific phenotype as validated at both protein and  
16 transcript levels with a decrease in ventricular-specific and an increase in atrial-specific  
17 markers. These results suggest that RA, at the dose and temporal exposure used in this study,  
18 maintains cardiac differentiation efficacy while pushing the differentiation process into an atrial  
19 lineage.

20 As a complementary assay, we used the NanoString digital multiplexed gene expression  
21 analysis to assess the expression of 250 genes custom-curated from the existing literature. We  
22 found *MYL2* and *MYH7*, markers of the ventricular phenotype, to be significantly differentially  
23 expressed between hiPSC-aCMs and –vCMs, matching the gene expression pattern of native  
24 adult human right atrial and left ventricular tissues<sup>24</sup>. Another ventricular-specific marker  
25 *KCNA4*<sup>25</sup> which encodes for the Kv1.4 channel of the slow I<sub>to</sub> was downregulated in hiPSC-  
26 aCMs. Canonical atrial markers such as *KCNA5* and *NR2F2* were also confirmed to be  
27 differentially upregulated in hiPSC-aCMs. Other markers of human atrial specificity such  
28 *CXCR4*, *GNAO1*, *JAG1*, *PLCB1*, and *TBX18* as retrieved from the GTEx database<sup>26</sup> were  
29 upregulated in our hiPSC-aCMs further demonstrating the effect of RA on driving the  
30 differentiation pathway into an atrial lineage.

31 *MYL7*, thought to be an atrial-specific marker, was not found to have a significantly  
32 higher expression in hiPSC-aCMs. The differential expression of MLC-2a may however require



1 additional maturation of the hiPSC-CMs. Other studies<sup>11,27</sup> have shown a high expression in  
2 MLC-2a at day 20 post-differentiation and a subsequent decrease over time in culture systems  
3 generating predominantly ventricular hiPSC-CMs. One study has shown a higher expression of  
4 MLC-2a in hiPSC-aCMs analyzed at a later date (earliest at day 60)<sup>6</sup>.

5         Electrophysiological differences between atrial and ventricular cardiomyocytes, in terms  
6 of voltage and Ca<sup>2+</sup> handling, define their function and are critical to the development and  
7 determination of efficacy of atrial-specific compounds. As demonstrated by whole-cell patch  
8 clamp and optical mapping measurements, the hiPSC-aCMs generated in this study exhibited  
9 atrial-like AP and Ca<sup>2+</sup> handling properties. Namely, the AP of hiPSC-aCMs were significantly  
10 shorter, along with a lack of a prolonged plateau phase as opposed to the AP of hiPSC-vCMs,  
11 an observation that is aligned with native cardiomyocyte electrophysiology<sup>28</sup>. Similarly, the CaT  
12 of hiPSC-aCMs had faster kinetics with a faster decay time as reflected by the differential  
13 expression of Ca<sup>2+</sup> channel isoforms, further demonstrating the differential physiology between  
14 hiPSC-aCMs and -vCMs.

15         In terms of APD measurements, we observed a good correlation between the patch  
16 clamp and optical mapping recordings for hiPSC-aCMs. In hiPSC-vCMs, however, the optical  
17 AP measurements were shorter overall than patch clamp recordings. This discrepancy may be  
18 attributed to the heterogeneity of our current ventricular differentiation protocol which generated  
19 predominantly ventricular cardiomyocytes but also contain a small proportion of non-ventricular  
20 phenotypes (i.e. atrial myocytes and nodal cells). Thus, the optical AP signals in the rig used  
21 represent an average from about 300,000 cells in each 1 cm<sup>2</sup> region of interest.

22         Another hallmark of cardiomyocyte function is rate-dependence, as described by the  
23 electrical restitution curve<sup>29</sup>. We observed that the electrical restitution properties were different  
24 between hiPSC-aCMs and -vCMs. Compared to hiPSC-vCMs, hiPSC-aCMs displayed a steady-  
25 state-like property by undergoing minimal APD<sub>80</sub> shortening in response to the lower ranges of  
26 the pacing protocol (cycle lengths of about 400 to 1000 ms) indicating full recovery of ion  
27 channel kinetics at these pacing ranges. In contrast, the hiPSC-vCMs displayed consistent  
28 APD<sub>80</sub> shortening at the same pacing range. It is important to note that APD restitution curves  
29 are likely different when using the standard steady-state extra stimulus protocol compared to  
30 dynamic pacing, particularly in cardiomyocytes with immature Ca<sup>2+</sup> handling and memory<sup>29</sup>. In  
31 relation to dynamic pacing protocol, hiPSC-vCMs exhibit a steeper maximum slope of the



1 restitution curve compared to hiPSC-aCMs as steady-state APD is the principal determinant of  
2 the slope of the ventricular restitution curve<sup>30</sup>.

3 The presence of specific ion channel currents (i.e.  $I_{Kur}$ ,  $I_{KAch}$ , and  $I_{CaL}$ ) explain, in part, the  
4 functional differences between the two cardiac chamber sub-types, the expressions of which  
5 were already shown in our qPCR and NanoString assays. We used a series of compounds (4-  
6 aminopyridine, dofetilide, vernakalant, AVE0118, UCL1684, and nifedipine) to demonstrate the  
7 function of atrial-specific ionic currents in our model system and were able to show the expected  
8 chamber specific differences between hiPSC-aCMs and -vCMs.

9 Dofetilide (DF) served as a positive control in our optical mapping assay as a clinically  
10 relevant drug which has a strong effect on  $I_{Kr}$  in both atria and ventricular CM<sup>31</sup>. As expected,  
11 dofetilide affected the repolarization of both hiPSC-aCMs and -vCMs, confirming the presence  
12 of  $I_{Kr}$  in both cell types. At clinically relevant doses of DF (3 and 10 nM), hiPSC-aCMs displayed  
13 greater sensitivity to the drug indicating a larger proportional contribution of  $I_{Kr}$  in the AP of  
14 hiPSC-aCMs relative to hiPSC-vCMs. This may partly explain the effectiveness of the drug in  
15 the clinical treatment of AF. However, clinical use of the drug to treat AF is limited due to its  
16 tendency to induce QT<sub>c</sub> prolongation. This pro-arrhythmic risk of TdP<sup>32</sup> which was captured by  
17 the prolongation of APD<sub>80</sub>, an *in vitro* surrogate of QT<sub>c</sub>, in the hiPSC-vCMs. This finding  
18 supports the utility of our optical mapping assay in predicting the risk of ventricular  
19 arrhythmogenesis *in vitro*.

20 The compound 4AP has been shown to selectively block  $K_v1.4$  ( $I_{to}$ ) and  $K_v1.5$  ( $I_{Kur}$ )<sup>33</sup> and  
21 is therefore expected to elicit a response in hiPSC-aCMs at lower doses than in hiPSC-vCMs as  
22  $I_{Kur}$  ( $K_v1.5$ ) is a strong functional indicator of atrial phenotype. Confirmation of the atrial  
23 expression of  $I_{Kur}$  channels was demonstrated by the stronger dose-dependent hiPSC-aCM AP  
24 prolongation to 4AP at all tested doses (10, 30, 50 and ,100  $\mu$ M) suggesting selective sensitivity  
25 of hiPSC-aCMs to 4AP due to a greater expression of  $K_v1.5$ . The inhibitory effects of 4AP were  
26 observed at higher doses (50 and 100  $\mu$ M) in hiPSC-vCMs which can be attributed to the  
27 heterogenous population, potential off-target effects at these high doses, as well as baseline  
28 expression of  $K_v1.4$  ( $I_{to}$ ).

29 Using nifedipine, we demonstrated the functional differences in  $Ca^{2+}$  handling dynamics  
30 between hiPSC-aCMs and -vCMs. Nifedipine elicited a dose-dependent response in hiPSC-  
31 vCMs demonstrating high sensitivity at 300 nM thereby confirming the functional presence of

1 Ca<sub>v</sub>1.2. In contrast, hiPSC-aCMs were relatively insensitive to nifedipine showing no statistically  
2 significant differences in APD at all tested doses. This finding is further corroborated by the  
3 relatively decreased expression of *CACNA1C* (Ca<sub>v</sub>1.2) in the hiPSC-aCMs. This suggests that  
4 Ca<sup>2+</sup> handling in hiPSC-aCMs may be reliant on other voltage-gated Ca<sup>2+</sup> channels such as  
5 Ca<sub>v</sub>1.3, as this Ca<sup>2+</sup> channel is blocked less potently by nifedipine<sup>34</sup>. Moreover, our qPCR assay  
6 confirmed that hiPSC-aCMs had higher expression of *CACNA1D* (Ca<sub>v</sub>1.3).

7 AVE0118 is an experimental K<sup>+</sup> channel blocker (I<sub>to</sub>, I<sub>Kur</sub>, and I<sub>Kr</sub>) that was predicted to  
8 demonstrate targeted effects in hiPSC-aCMs. However, only a nuanced atrial specificity was  
9 observed in our assay. Although the effects were proportionally larger in hiPSC-aCMs,  
10 AVE0118 prolonged early repolarization of both hiPSC-aCMs and -vCMs in a similar fashion.  
11 The drug prolonged mid- and late-repolarization at a lower dose (1 μM) in hiPSC-aCMs showing  
12 minimal atrial specific effects. Interestingly, AVE0118 greatly affected Ca<sup>2+</sup> handling in hiPSC-  
13 aCMs compared to hiPSC-vCMs with larger proportional prolongation of CaTD<sub>50</sub> at all doses.  
14 These results were unexpected as AVE0118 is thought to be highly specific to hiPSC-aCMs due  
15 to its I<sub>Kur</sub> blocking component. Perhaps the observed mixed-effects in both cell types is due to  
16 the drug binding to I<sub>to</sub> (IC<sub>50</sub>: 3.4 μM) and I<sub>Kr</sub> (IC<sub>50</sub>: 9.6 μM)<sup>35</sup> which prolongs APD at the tested  
17 AVE0118 doses of 3 and 10 μM as genes encoding the channels producing the I<sub>to</sub> (*KCNA4*) and  
18 I<sub>Kr</sub> (*KCNH2*) were expressed in our hiPSC-vCMs. The drug has also been shown to be effective  
19 in terminating certain ventricular arrhythmias<sup>36</sup> which was predicted based on our results of  
20 prolongation in the APD of hiPSC-vCMs.

21 Next, we used UCL1684, a highly specific SK channel pore blocker, to assess the  
22 presence of functional SK channels in hiPSC-aCMs. The SK channel has 3 paralogs but the  
23 SK3 channel variant (*KCNN3*) has been shown to be atrial-specific and has been implicated in  
24 AF pathogenesis in several GWAS studies<sup>37,38</sup>. In this study, UCL1684 displayed high specificity  
25 towards hiPSC-aCMs with a strong dose-dependent response. The drug confirmed the  
26 presence of functional SK channels in hiPSC-aCMs at 3 μM with a positive dose-dependent  
27 response while having no effect on hiPSC-vCMs at all tested doses (0.3, 1, 3, and 10 μM).

28 Vernakalant is touted as an atrial-selective compound clinically approved for intravenous  
29 cardioversion of AF<sup>39</sup>. Strikingly, out of all the tested drugs, vernakalant showed the most  
30 pronounced atrial-selective effects even though it is a blocker of multiple ion channels (I<sub>Na</sub>, I<sub>Kur</sub>,  
31 and I<sub>K,Ach</sub>). Vernakalant prolonged APD and CaTD of hiPSC-aCMs at three tested doses (3, 10,  
32 30 μM). However, no statistically significant changes were observed in hiPSC-vCMs at early-

1 and mid- repolarization while the slight prolongation at APD<sub>80</sub> at the clinically relevant dose (30  
2  $\mu$ M) may be attributed to the I<sub>Na</sub> blocking component of vernakalant. This result further  
3 demonstrates the sensitivity of the assay in establishing atrial-selective drug effects.

4 This study has several limitations. One limitation in our findings is that we cannot directly  
5 compare the results from qPCR and NanoString as both assays have fundamental differences  
6 in technical principles and statistical methodologies. Taken together, however, both assays  
7 show the global changes in cell type specific gene markers and further validate the role of  
8 retinoic acid in directing the cardiac differentiation process towards an atrial lineage. The main  
9 limitation in this field is the maturation state of the hiPSC-CMs as they have an overall immature  
10 phenotype with some crucial differences compared to adult cardiomyocytes<sup>40</sup>. Nonetheless, we  
11 were able to observe the stark differences in transcriptomic, protein, as well as functional  
12 signatures of AP and CaT in the two generated chamber-specific cell types. Additionally,  
13 maturation stage does not explain the differences in chamber-specific phenotype as parallel  
14 batch differentiation and time-in-culture were incorporated in our study design. Most importantly,  
15 we were able to capture effects of drugs that were expected to have atrial-specific properties in  
16 hiPSC-aCMs.

## 17 CONCLUSION

18 The ability to differentiate hiPSC-aCMs provide a unique opportunity to study atrial  
19 physiology and its pharmacologic responses in a human-relevant *in vitro* model. We  
20 demonstrated an hiPSC-based *in vitro* model that recapitulates the molecular and functional  
21 characteristics of the phenotype of native atrial tissue. Our platform adds to the repertoire of  
22 cardiac drug screening and can be readily applied in future efforts of atrial-specific drug  
23 discovery.

24

## 1 ACKNOWLEDGEMENTS

2 We would like to thank Ms. Salina Kung and Ms. Jennifer Yi for their help in designing  
3 the NanoString codeset. This work was financially supported by the Canadian Institutes of  
4 Health Research (GFT), the Canada Innovation Fund (GFT), the Stem Cell Network (GFT and  
5 ZL), and the Michael Smith Foundation (ZL).

## 6 DISCLOSURE OF POTENTIAL CONFLICTS OF INTEREST

7 The authors declared no potential conflict of interest.

## 8 DATA AVAILABILITY STATEMENT

9 Data can be made available upon reasonable request.

10

## 1 REFERENCES

- 2 1. Karakikes I, Ameen M, Termglinchan V, Wu JC. Human Induced Pluripotent Stem Cell-Derived  
3 Cardiomyocytes: Insights into Molecular, Cellular, and Functional Phenotypes. *Circ Res*.  
4 2015;117(1):80-88. doi:10.1161/CIRCRESAHA.117.305365
- 5 2. Xavier-Neto J, Neville C. A retinoic acid-inducible transgenic marker of sino-atrial development in  
6 the mouse heart. *Development*. 1999;2687:2677-2687.
- 7 3. Niederreither K, Vermot J, Schuhbauer B, Chambon P, Dollé P. Embryonic retinoic acid synthesis is  
8 essential for heart morphogenesis in the mouse. *Development*. 2001;128:1019-1031.
- 9 4. Hochgreb T, Linhares VL, Menezes DC, et al. A caudorostral wave of RALDH2 conveys  
10 anteroposterior information to the cardiac field. *Development*. 2003;130(22):5363-5374.  
11 doi:10.1242/dev.00750
- 12 5. Moss JB, Xavier-Neto J, Shapiro MD, et al. Dynamic patterns of retinoic acid synthesis and  
13 response in the developing mammalian heart. *Dev Biol*. 1998;199(1):55-71.  
14 doi:10.1006/dbio.1998.8911
- 15 6. Lee JH, Protze SI, Laksman Z, Backx PH, Keller GM. Human Pluripotent Stem Cell-Derived Atrial  
16 and Ventricular Cardiomyocytes Develop from Distinct Mesoderm Populations. *Cell Stem Cell*.  
17 2017;21(2):179-194.e4. doi:10.1016/j.stem.2017.07.003
- 18 7. Laksman Z, Wauchop M, Lin E, et al. Modeling Atrial Fibrillation using Human Embryonic Stem  
19 Cell-Derived Atrial Tissue. 2017. doi:10.1038/s41598-017-05652-y
- 20 8. Devalla HD, Schwach V, Ford JW, et al. Atrial-like cardiomyocytes from human pluripotent stem  
21 cells are a robust preclinical model for assessing atrial-selective pharmacology. *EMBO Mol Med*.  
22 2015;7(4):394-410. doi:10.15252/emmm.201404757
- 23 9. Argenziano M, Lambers E, Hong L, et al. Electrophysiologic Characterization of Calcium Handling  
24 in Human Induced Pluripotent Stem Cell-Derived Atrial Cardiomyocytes. *Stem Cell Reports*.  
25 2018;10(6):1867-1878. doi:10.1016/j.stemcr.2018.04.005
- 26 10. Cyganek L, Tiburcy M, Sekeres K, et al. Deep phenotyping of human induced pluripotent stem  
27 cell-derived atrial and ventricular cardiomyocytes. *JCI Insight*. 2018;3(12).  
28 doi:10.1172/jci.insight.99941
- 29 11. Lian X, Zhang J, Azarin SM, et al. Directed cardiomyocyte differentiation from human pluripotent  
30 stem cells by modulating Wnt/ $\beta$ -catenin signaling under fully defined conditions. *Nat Protoc*.  
31 2013;8:162-175. doi:10.1038/nprot.2012.150
- 32 12. Shafaattalab S, Li AY, Lin E, et al. In vitro analyses of suspected arrhythmogenic thin filament  
33 variants as a cause of sudden cardiac death in infants. *Proc Natl Acad Sci U S A*. March  
34 2019;201819023. doi:10.1073/pnas.1819023116
- 35 13. Shafaattalab S, Lin E, Christidi E, et al. Ibrutinib Displays Atrial-Specific Toxicity in Human Stem  
36 Cell-Derived Cardiomyocytes. *Stem Cell Reports*. 2019;12(5):996-1006.  
37 doi:10.1016/j.stemcr.2019.03.011
- 38 14. Pei F, Jiang J, Bai S, et al. Chemical-defined and albumin-free generation of human atrial and  
39 ventricular myocytes from human pluripotent stem cells. *Stem Cell Res*. 2017;19:94-103.  
40 doi:10.1016/j.scr.2017.01.006

- 1 15. Zhang Q, Jiang J, Han P, et al. Direct differentiation of atrial and ventricular myocytes from  
2 human embryonic stem cells by alternating retinoid signals. *Cell Res.* 2011;21(4):579-587.  
3 doi:10.1038/cr.2010.163
- 4 16. Geiss GK, Bumgarner RE, Birditt B, et al. Direct multiplexed measurement of gene expression with  
5 color-coded probe pairs. *Nat Biotechnol.* 2008;26(3):317-325. doi:10.1038/nbt1385
- 6 17. Roden D, Willerson JT. Cardiovascular Drugs. *Circulation.* 2012;102(5):415-415.  
7 doi:10.1161/01.cir.97.5.415
- 8 18. Ravens U. Atrial-selective K<sup>+</sup> channel blockers: potential antiarrhythmic drugs in atrial  
9 fibrillation? . *Can J Physiol Pharmacol.* 2017;95(11):1313-1318. doi:10.1139/cjpp-2017-0024
- 10 19. Wang Y, Tang S, Harvey KE, et al. Molecular Determinants of the Differential Modulation of Ca<sup>v</sup>  
11 1.2 and Ca<sup>v</sup> 1.3 by Nifedipine and FPL 64176 s. *Mol Pharmacol Mol Pharmacol.* 2018;94:973-983.  
12 doi:10.1124/mol.118.112441
- 13 20. Wettwer E, Hála O, Christ T, et al. Role of IK<sub>ur</sub> in controlling action potential shape and  
14 contractility in the human atrium: Influence of chronic atrial fibrillation. *Circulation.*  
15 2004;110(16):2299-2306. doi:10.1161/01.CIR.0000145155.60288.71
- 16 21. Strøbaek D, Jørgensen TD, Christophersen P, Ahring PK, Olesen SP. Pharmacological  
17 characterization of small-conductance Ca(2+)-activated K(+) channels stably expressed in HEK  
18 293 cells. *Br J Pharmacol.* 2000;129(5):991-999. doi:10.1038/sj.bjp.0703120
- 19 22. Finnin M. Vernakalant: A novel agent for the termination of atrial fibrillation. *Am J Heal Pharm.*  
20 2010;67(14):1157-1164. doi:10.2146/ajhp080501
- 21 23. Roy D, Pratt CM, Torp-Pedersen C, et al. Vernakalant hydrochloride for rapid conversion of atrial  
22 fibrillation: A phase 3, randomized, placebo-controlled trial. *Circulation.* 2008;117(12):1518-1525.  
23 doi:10.1161/CIRCULATIONAHA.107.723866
- 24 24. Jonsson M, Synnergren J, Jeppsson A, Dellgren G, Asp J. Comparison of human cardiac gene  
25 expression profiles in paired samples of right atrium and left ventricle collected in vivo. *Physiol*  
26 *Genomics.* 2011;44(1):89-98. doi:10.1152/physiolgenomics.00137.2011
- 27 25. Niwa N, Nerbonne JM. Molecular determinants of cardiac transient outward potassium current  
28 (I<sub>to</sub>) expression and regulation. *J Mol Cell Cardiol.* 2010;48(1):12-25.  
29 doi:10.1016/j.yjmcc.2009.07.013
- 30 26. The Genotype-Tissue Expression (GTEx) Project was supported by the Common Fund of the  
31 Office of the Director of the National Institutes of Health, and by NCI, NHGRI, NHLBI, NIDA, NIMH,  
32 and NINDS. The data used for the analyses described in this manuscript. :23.
- 33 27. Burridge PW, Matsa E, Shukla P, et al. Chemically defined generation of human cardiomyocytes.  
34 *Nat Methods.* 2014;11(8):855-860. doi:10.1038/nMeth.2999
- 35 28. Brandenburg S, Kohl T, Williams GSB, et al. Axial tubule junctions control rapid calcium signaling  
36 in atria. *J Clin Invest.* 2016;126(10):3999-4015. doi:10.1172/JCI88241
- 37 29. Goldhaber JJ, Xie L-H, Duong T, Motter C, Khoo K, Weiss JN. Action Potential Duration Restitution  
38 and Alternans in Rabbit Ventricular Myocytes. *Circ Res.* 2005;96(4):459-466.  
39 doi:10.1161/01.res.0000156891.66893.83

- 1 30. Shattock MJ, Park KC, Yang H-Y, et al. Restitution slope is principally determined by steady-state  
2 action potential duration. *Cardiovasc Res.* 2017;113(7):817-828. doi:10.1093/cvr/cvx063
- 3 31. Lip GYH, Fauchier L, Freedman SB, et al. Atrial fibrillation. *Nat Rev Dis Prim.* 2016;2:16016.  
4 doi:10.1038/nrdp.2016.16
- 5 32. Jaiswal A, Goldbarg S. Dofetilide induced torsade de pointes: Mechanism, risk factors and  
6 management strategies. *Indian Heart J.* 2014;66:640-648. doi:10.1016/j.ihj.2013.12.021
- 7 33. Wang Z, Fermini B, Nattel S. Effects of flecainide, quinidine, and 4-aminopyridine on transient  
8 outward and ultrarapid delayed rectifier currents in human atrial myocytes. *J Pharmacol Exp*  
9 *Ther.* 1995;272(1):184-196. <http://www.ncbi.nlm.nih.gov/pubmed/7815332>.
- 10 34. Wang Y, Tang S, Harvey KE, et al. Molecular Determinants of the Differential Modulation of  
11 Cav1.2 and Cav1.3 by Nifedipine and FPL 64176. *Mol Pharmacol.* 2018;94(3):973-983.  
12 doi:10.1124/mol.118.112441
- 13 35. Gogelein H, Brendel J, Steinmeyer K, et al. Effects of the atrial antiarrhythmic drug AVE0118 on  
14 cardiac ion channels. *Naunyn Schmiedebergs Arch Pharmacol.* 2004;370(3):183-192.  
15 doi:10.1007/s00210-004-0957-y
- 16 36. Billman GE, Kukielka M. Novel transient outward and ultra-rapid delayed rectifier current  
17 antagonist, AVE0118, protects against ventricular fibrillation induced by myocardial ischemia. *J*  
18 *Cardiovasc Pharmacol.* 2008;51(4):352-358. doi:10.1097/FJC.0b013e31816586bd
- 19 37. Diness JG, Sørensen US, Nissen JD, et al. Inhibition of small-conductance  $Ca^{2+}$ -activated  
20  $K^{+}$  channels terminates and protects against atrial fibrillation. *Circ Arrhythmia Electrophysiol.*  
21 2010;3(4):380-390. doi:10.1161/CIRCEP.110.957407
- 22 38. Diness JG, Skibsbye L, Jespersen T, et al. Effects on atrial fibrillation in aged hypertensive rats by  
23  $Ca^{2+}$ -activated  $K^{+}$  channel inhibition. *Hypertension.* 2011;57(6):1129-1135.  
24 doi:10.1161/HYPERTENSIONAHA.111.170613
- 25 39. Canada H. Brinavess Product Monograph. 2018:1-33.
- 26 40. Tu C, Chao BS, Wu JC. Strategies for Improving the Maturity of Human Induced Pluripotent Stem  
27 Cell-Derived Cardiomyocytes. *Circ Res.* 2018;123(5):512-514.  
28 doi:10.1161/CIRCRESAHA.118.313472

29

30



## 1 FIGURE LEGENDS

### 2 **Figure 1: Directed differentiation of hiPSC-derived atrial and ventricular CMs.**

3 A) Schematic depicting the atrial differentiation protocol. Doses of 0.75  $\mu$ M retinoic acid (RA)  
4 were added to the cells every 24 hours on days 4, 5, and 6 with media exchanged to RPMI1640  
5 + B27 with insulin at day 7. Cells were harvested for analysis at day 20. B) qPCR analysis of  
6 ventricular markers *MYL2* and *IRX4*, cardiac marker *NKX2.5*, and atrial markers *NPPA*, *GJA5*,  
7 *CACNA1D*, *KCNA5*, and *KCNJ3*. n = 3, unpaired t-test, \*p < 0.05. C) Flow cytometric analysis of  
8 cardiac troponin T (cTnT) and myosin light chain 2v (normalized to cTnT expression) in hiPSC-  
9 aCMs and -vCMs. n = 4, unpaired t-test, \*\*\*p<0.001. D) Average beating rates of hiPSC-aCMs  
10 and -vCMs from the day they begin to beat until day 20. n = 4 independent differentiation  
11 batches E) Atrial Natriuretic peptide (ANP) concentration between hiPSCs, and hiPSC-aCMs  
12 and -vCMs determined by competitive ELISA. n = 3 and n = 2 hiPSC lines, unpaired t-test  
13 \*p<0.05, \*\* p<0.01, \*\*\*p<0.001. Data are presented as mean  $\pm$  SEM and the n represents the  
14 number of independent differentiation batches.

### 15 **Figure 2: Gene expression analysis of hiPSC-aCMs and -vCMs using NanoString.**

16 Global gene expression pattern of hiPSC-aCMs and -vCMs shown in A) heat map of the  
17 expression of the 250 genes across samples of hiPSC-aCMs and -vCMs. The cluster  
18 dendrogram shows the unsupervised hierarchical clustering that was conducted using the  
19 agglomerative algorithm and the Euclidian distance criterion. B) Differentially expressed genes  
20 between hiPSC-aCMs and -vCMs expressed in volcano plot shows 14 upregulated (red) and 27  
21 downregulated (blue) genes in hiPSC-aCMs. Solid horizontal line represents the Benjamini-  
22 Hochberg false discovery rate (FDR) adjusted p-value < 0.05 (-log<sub>10</sub> = 1.3). Dashed vertical  
23 lines represent the arbitrary log<sub>2</sub> fold change cut-off of -0.5 and 0.5. C) 42 differentially  
24 expressed genes identified from the statistical criteria of FDR adjusted p-value < 0.05 and log<sub>2</sub>  
25 fold change of <-0.5 and > 0.5. Data are presented as mean  $\pm$  SEM. n = 5 independent  
26 differentiation batches.

### 27 **Figure 3: hiPSC-aCMs and -vCMs have distinct electrophysiological characteristics.**

28 Single differentiated hiPSC-aCMs and -vCMs were plated on gelatin and Geltrex after 30  
29 days in culture. A) Whole cell current clamp recordings from a spontaneously beating hiPSC-  
30 vCM. B) Recorded action potential (APs) demonstrates typical prolonged plateau phase in both  
31 spontaneous (left) and/or paced at 1 Hz (right). C) Current clamp recording from a

1 spontaneously beating hiPSC-aCM. D) Single AP from hiPSC-aCM demonstrates shortened  
2 action potential duration (APD) and lack of prolonged plateau phase, spontaneous (left), paced  
3 at 1 Hz (right). E) The first differential of voltage recordings from hiPSC-aCMs and -vCMs were  
4 used to calculate the maximal upstroke velocities. F) One minute after achieving the whole-cell  
5 configuration, the average resting membrane potential was measured. G) Spontaneous and 1 Hz  
6 paced APs were assessed for duration at 50% of peak (APD<sub>50</sub>), and H) 90% of peak (APD<sub>90</sub>).  
7 Statistics were performed by unpaired t-test. \* p < 0.05, \*\*\* p < 0.005. Data are presented as  
8 mean ± SEM. Two differentiation batches were included in this analysis.

9 **Figure 4: Functional phenotyping of hiPSC-derived atrial and ventricular CMs using**  
10 **optical mapping.**

11 Representative average traces of A) action potential and B) Ca<sup>2+</sup> transients of hiPSC-  
12 aCMs and -vCMs electrically paced at 1 Hz. C) Electrical restitution curve measured at APD<sub>80</sub>  
13 relative to the diastolic interval (DI). D) Quantification of early- (APD<sub>20</sub>), mid- (APD<sub>50</sub>), and late-  
14 (APD<sub>80</sub>) repolarization, unpaired t-test, \*p < 0.05, \*\*p < 0.01. E) Quantification of early-  
15 (CaTD<sub>20</sub>), mid- (CaTD<sub>50</sub>), and late- (CaTD<sub>80</sub>) Ca<sup>2+</sup> transient decay, unpaired t-test, \*\*\*p < 0.001.  
16 F) Time to peak (TTP) of the Ca<sup>2+</sup> transient, unpaired t-test, \*\*\*p < 0.001. G) Time constant (τ)  
17 of Ca<sup>2+</sup> decay, unpaired t-test \*p < 0.05. H) Maximum slope of the electrical restitution as shown  
18 in panel C, unpaired t-test, \*p < 0.05. Electrical restitution curves were measured under a  
19 variable rate pacing protocol (60 – 200 bpm) as described in the Supplemental information. n =  
20 4 (four independent differentiation batches) and cardiac enriched hiPSC-aCMs and -vCMs were  
21 analyzed in these set of experiments. Data are presented as mean ± SEM.

22 **Figure 5: The effects of dofetilide and nifedipine on action potential and Ca<sup>2+</sup> transient of**  
23 **hiPSC-aCMs and -vCMs.**

24 Representative traces of action potential and Ca<sup>2+</sup> transients illustrating the effects of A)  
25 dofetilide and B) nifedipine on hiPSC-aCMs and -vCMs. Higher drug doses are presented by a  
26 progressively darker shade. The effects of C) 4-aminopyridine and D) nifedipine on normalized  
27 (percent change from pre-drug baseline) action potential duration (APD) and Ca<sup>2+</sup> transient  
28 duration (CaTD); both parameters being measured at 20, 50, and 80%. Dashed line is the  
29 normalized pre-drug control presented as 0% change. n = 6 from six independent differentiation  
30 batches. hiPSC-derived atrial cardiomyocytes (aCMs) are shown in red while hiPSC-derived  
31 ventricular cardiomyocytes (vCMs) are presented in blue. Data are presented as mean ± SEM.

1 Drug effects were compared between hiPSC-aCMs and -vCMs at each dose using unpaired t-  
2 test, \*p < 0.05, \*\*p < 0.001, \*\*\*p < 0.001. NS stands for not significant.

3 **Figure 6: The effects of 4-aminopyridine (4AP) and AVE0118 on action potential and Ca<sup>2+</sup>**  
4 **transient of hiPSC-aCMs and -vCMs.**

5 Representative traces of action potential and Ca<sup>2+</sup> transients illustrating the effects of A)  
6 4-aminopyridine (4AP) and B) AVE0118 on hiPSC-aCMs and -vCMs. Higher drug dose is  
7 presented by a progressively darker shade. The effects of C) dofetilide and D) vernakalant on  
8 normalized (percent change from pre-drug baseline) action potential duration (APD), and B)  
9 Ca<sup>2+</sup> transient duration (CaTD); both parameters being measured at 20, 50, and 80%. Dashed  
10 line is the normalized pre-drug control presented as 0% change. n = 6 from six independent  
11 differentiation batches. hiPSC-derived atrial cardiomyocytes (aCMs) are shown in red while  
12 hiPSC-derived ventricular cardiomyocytes (vCMs) are presented in blue. Data are presented as  
13 mean ± SEM. Drug effects were compared between hiPSC-aCMs and -vCMs at each dose  
14 using unpaired t-test, \*p < 0.05, \*\*p < 0.001, \*\*\*p < 0.001. NS stands for not significant.

15 **Figure 7: The effects of UCL1684 and vernakalant on action potential and Ca<sup>2+</sup> transient**  
16 **of hiPSC-aCMs and -vCMs.**

17 Representative V<sub>m</sub> and Ca<sup>2+</sup> transients illustrating the effects of A) UCL1684 and B)  
18 vernakalant on hiPSC-aCMs and -vCMs. Higher drug doses are presented by a progressively  
19 darker shade. The effects of C) AVE0118 and D) UCL1684 on normalized (percent change from  
20 pre-drug baseline) action potential duration (APD) and Ca<sup>2+</sup> transient duration (CaTD); both  
21 parameters being measured at 20, 50, and 80%. Dashed line is the normalized pre-drug control  
22 presented as 0% change. n = 6 from six independent differentiation batches. hiPSC-derived  
23 atrial cardiomyocytes (aCMs) are shown in red while hiPSC-derived ventricular cardiomyocytes  
24 (vCMs) are presented in blue. Data are presented as mean ± SEM. Drug effects were compared  
25 between hiPSC-aCMs and -vCMs using unpaired t-test at each dose, \*p < 0.05, \*\*p < 0.001,  
26 \*\*\*p < 0.001. NS stands for not significant.

27

hiPSC-derived atrial myocyte-based drug platform

Gunawan et al.

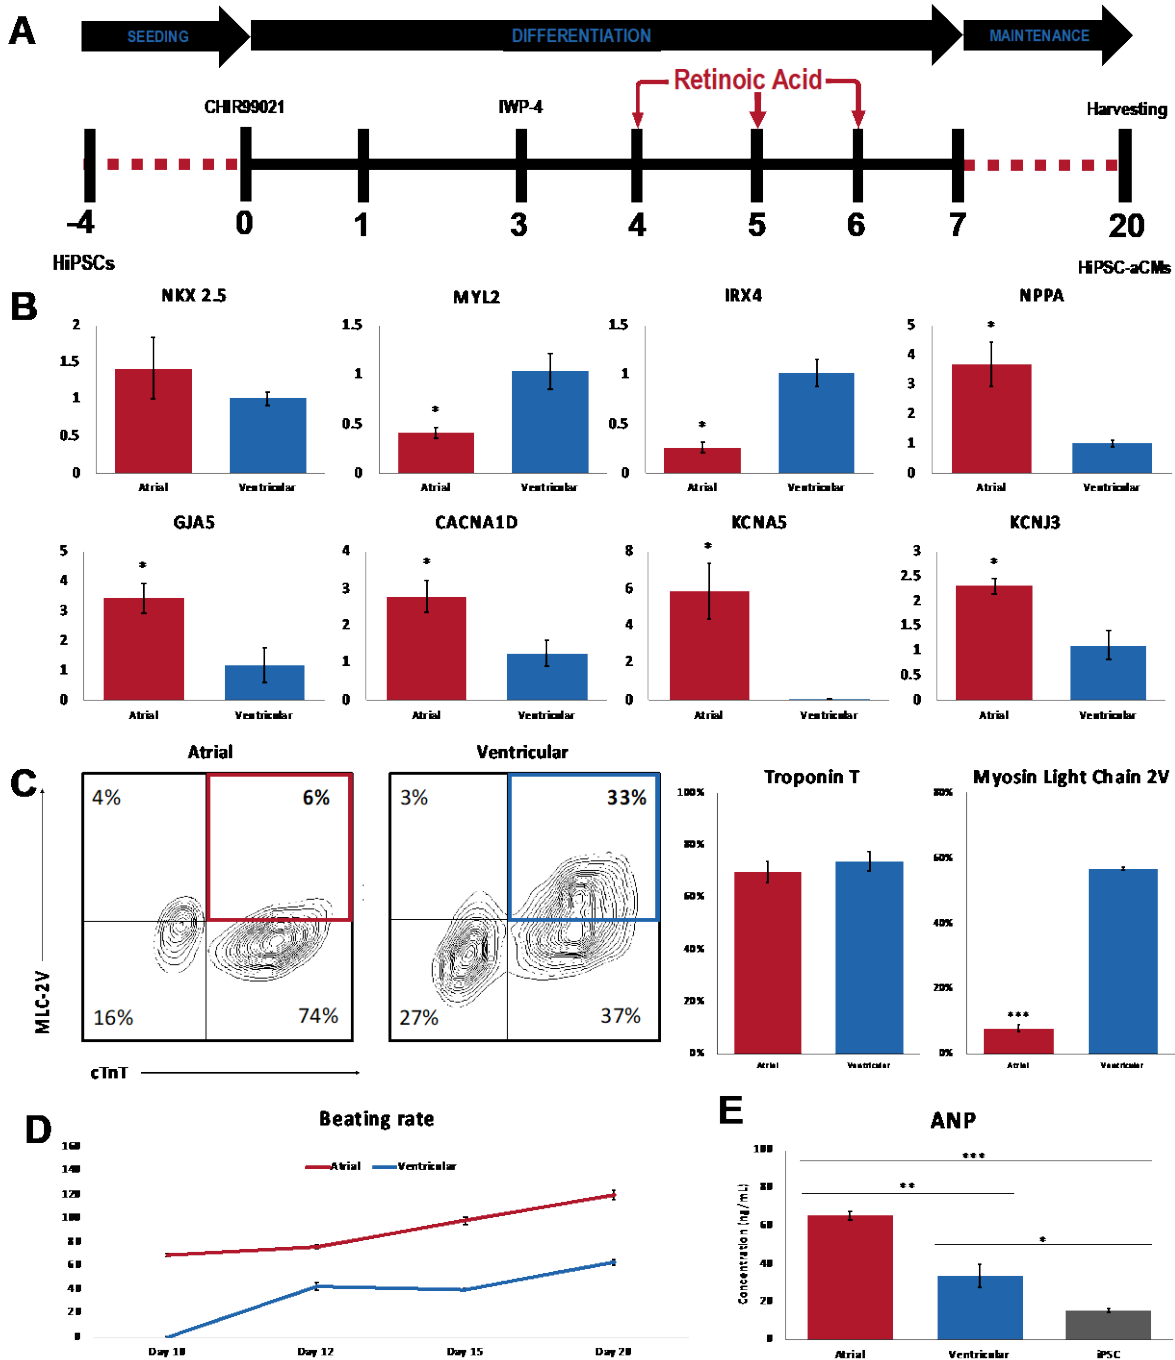

1

2 Figure 1: Directed differentiation of hiPSC-derived atrial and ventricular CMs.

## hiPSC-derived atrial myocyte-based drug platform

Gunawan et al.

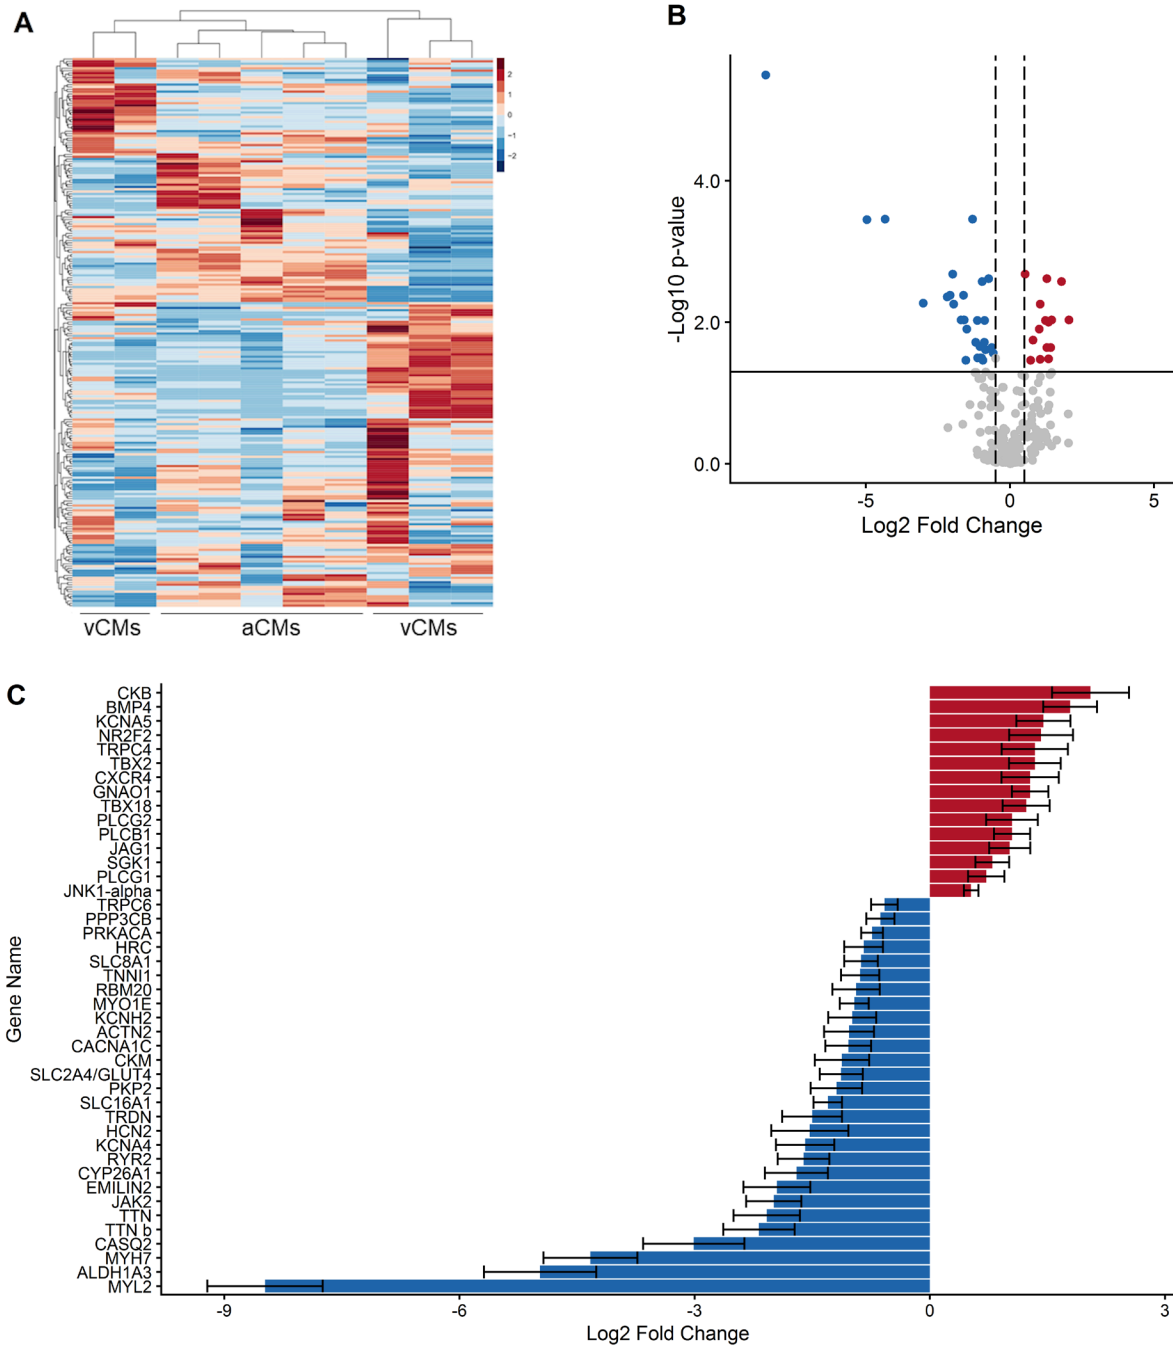

1

2 **Figure 2: Gene expression analysis of hiPSC-aCMs and -vCMs using NanoString.**

3

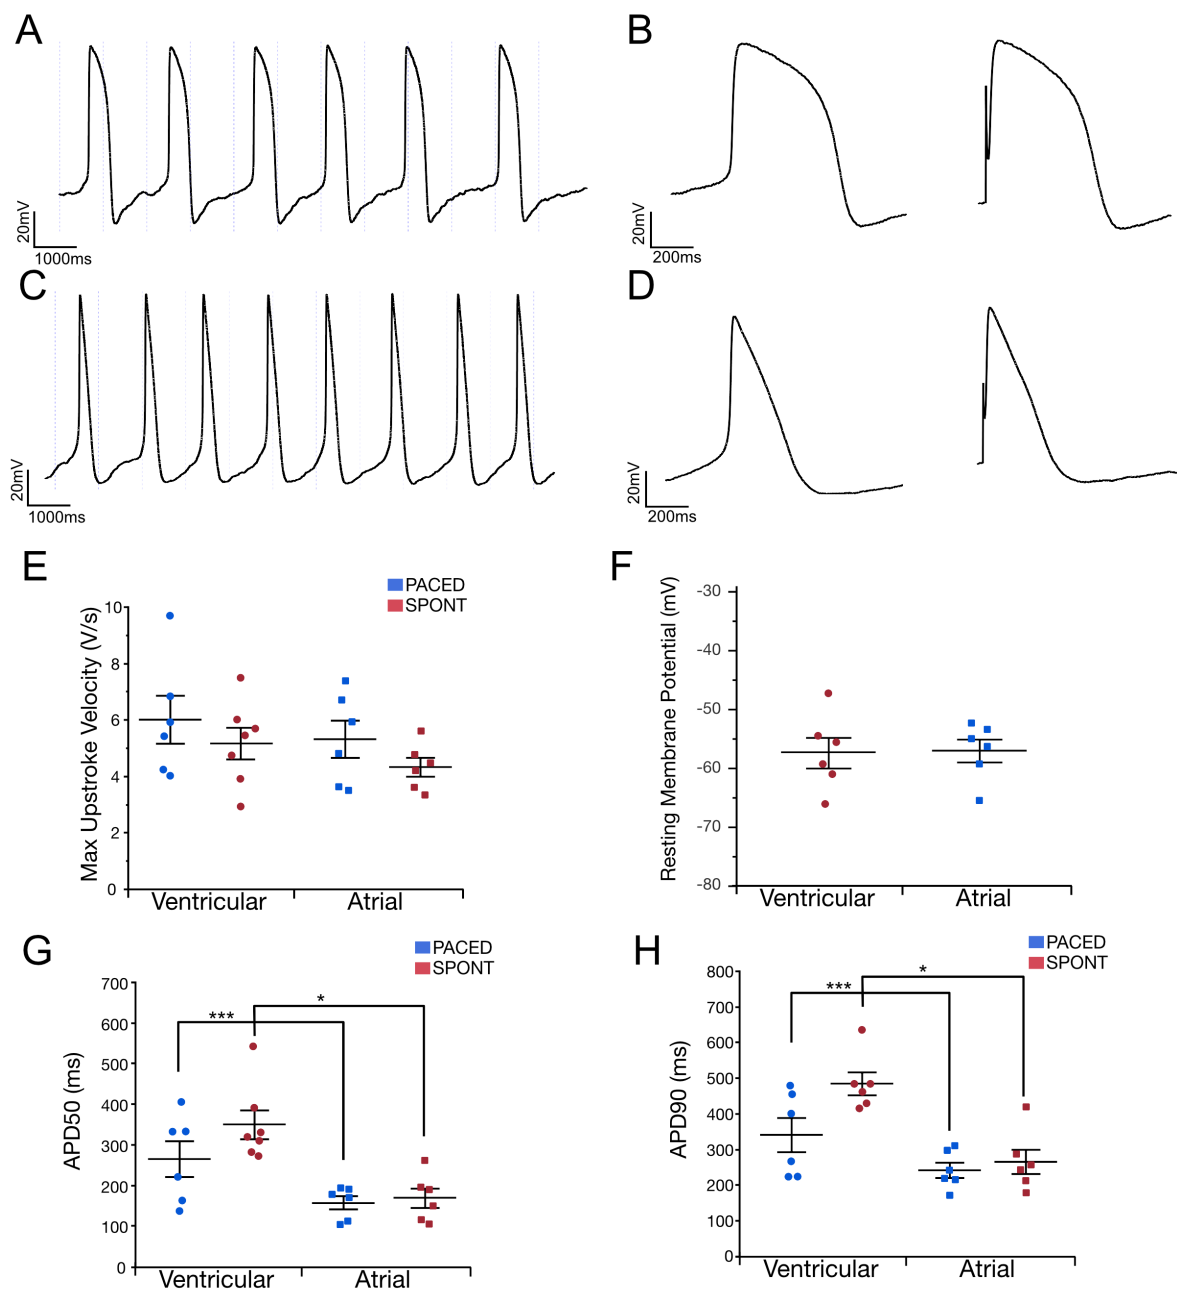

1

2 **Figure 3: hiPSC-aCMs and -vCMs have distinct electrophysiological characteristics.**

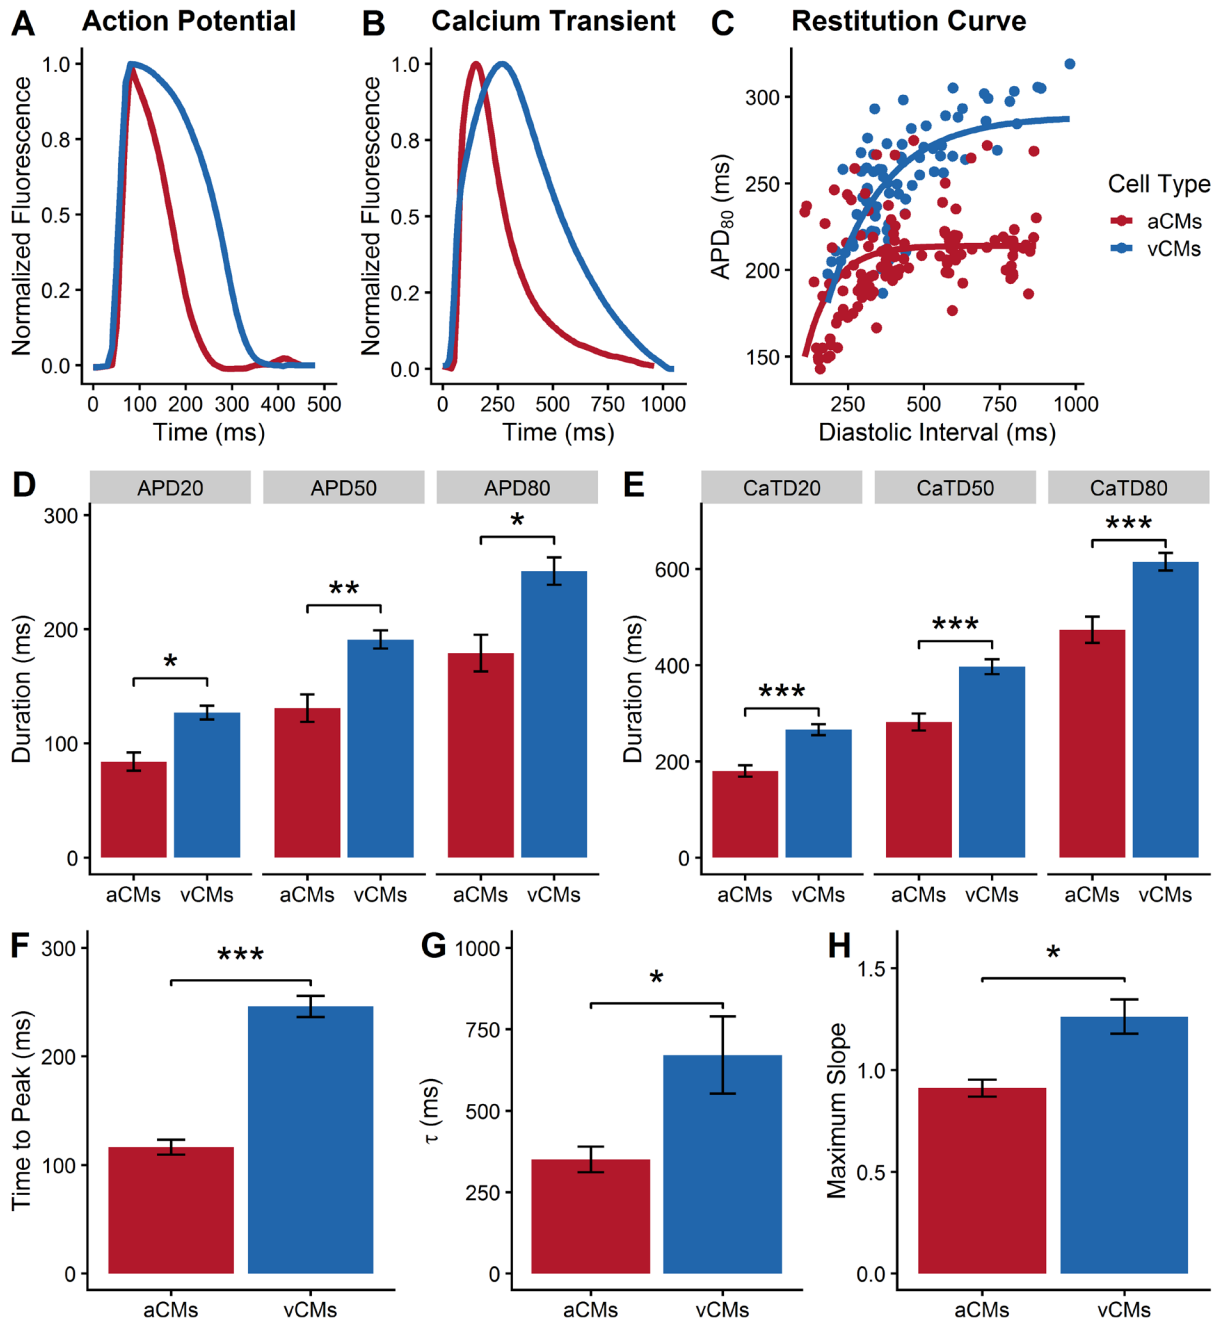

1

2 **Figure 4: Functional phenotyping of hiPSC-derived atrial and ventricular CMs using**  
3 **optical mapping.**



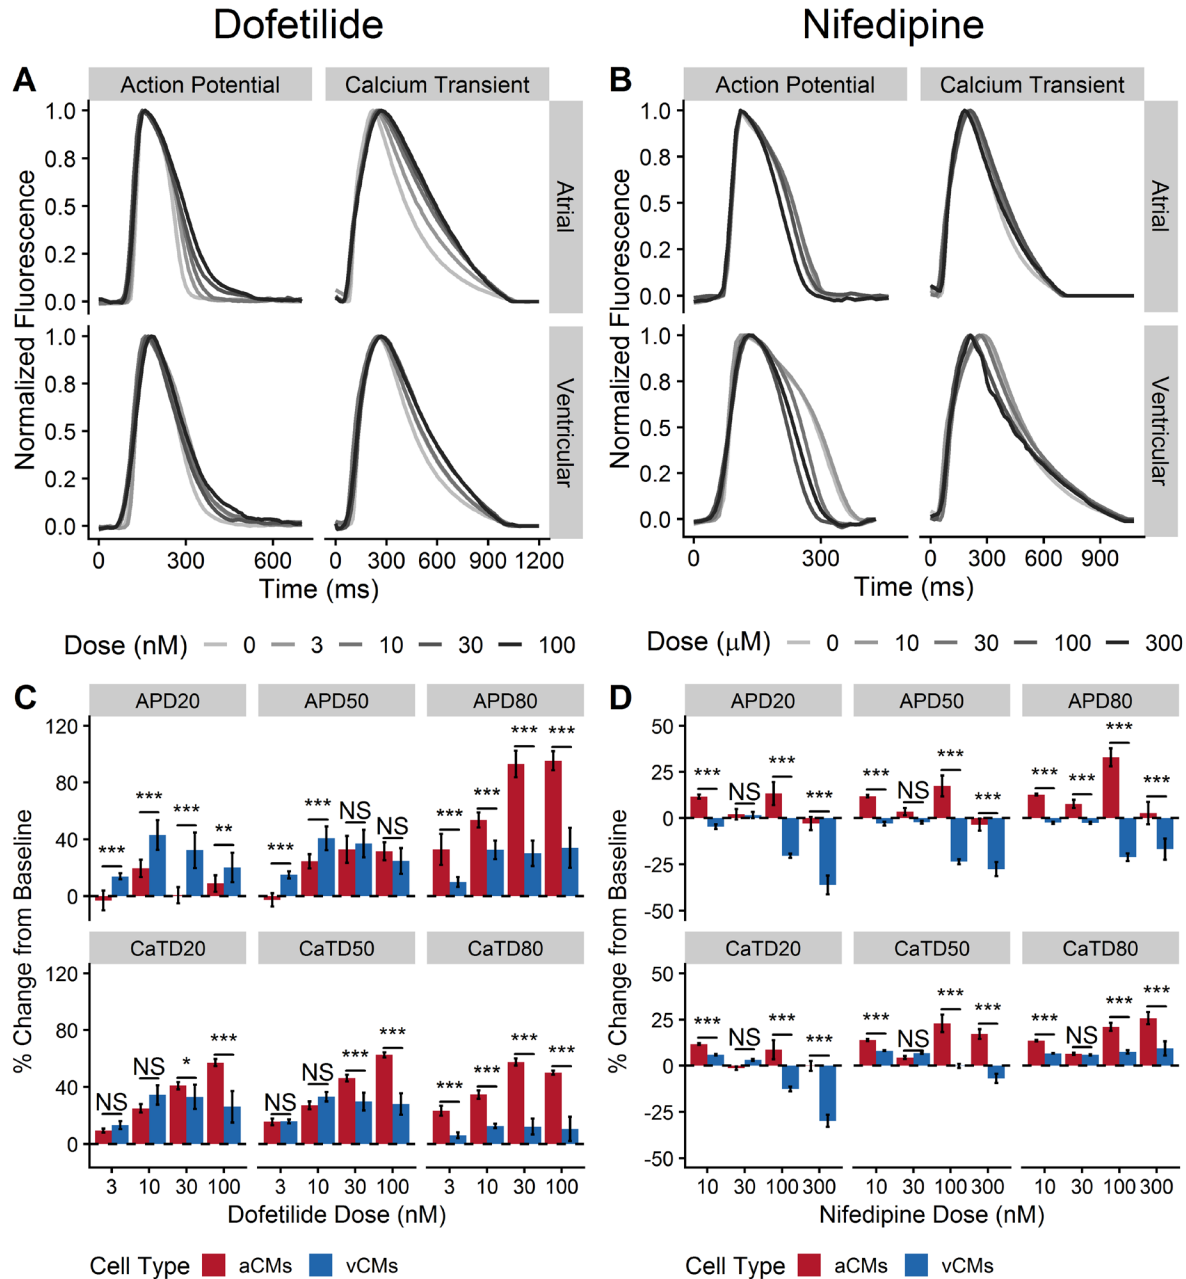

1

2 **Figure 5: The effects of dofetilide and nifedipine on action potential and Ca<sup>2+</sup> transient of**  
 3 **hiPSC-aCMs and -vCMs.**

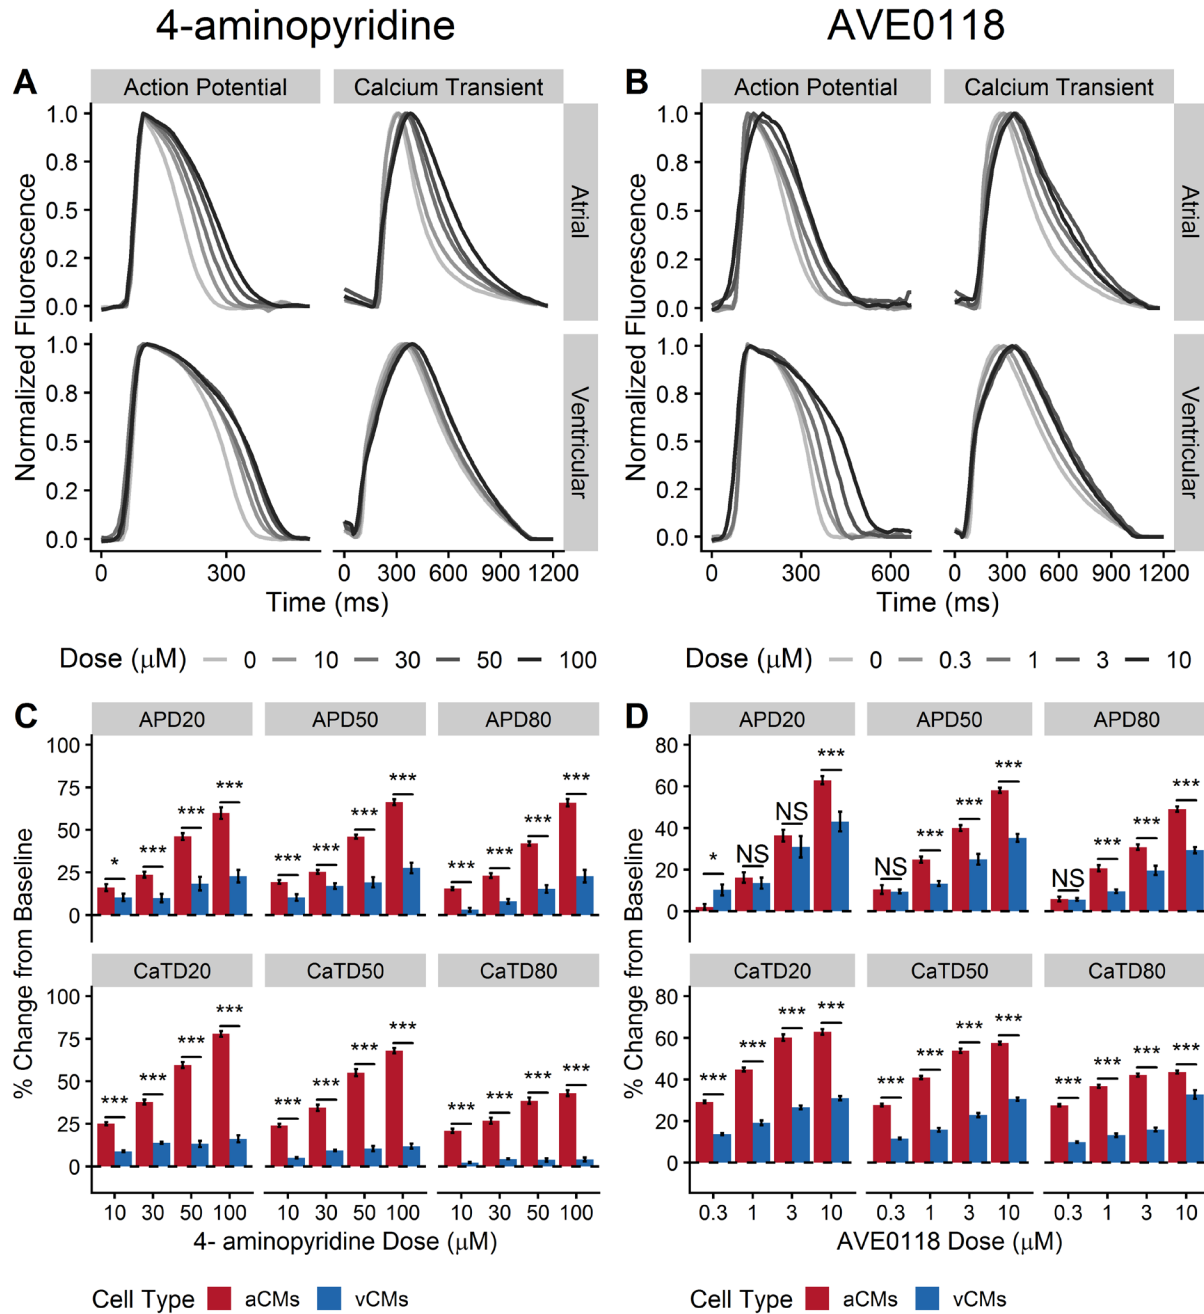

1

2 **Figure 6: The effects of 4-aminopyridine (4AP) and AVE0118 on action potential and Ca<sup>2+</sup>**  
 3 **transient of hiPSC-aCMs and -vCMs.**

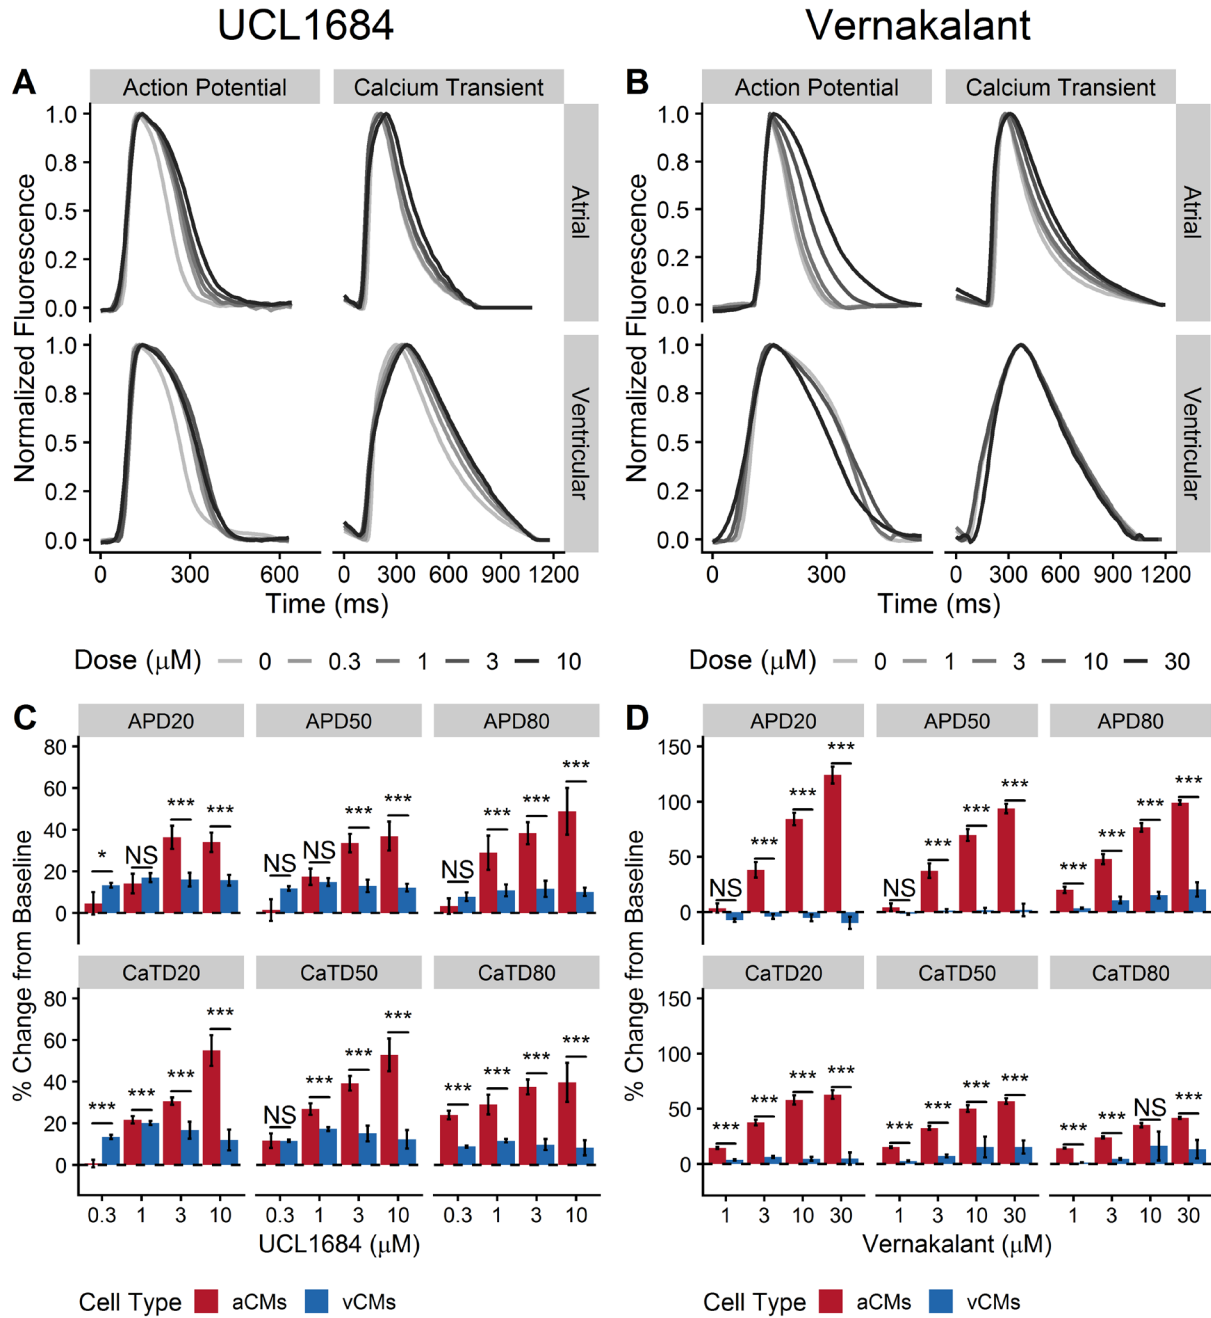

1

2 **Figure 7: The effects of UCL1684 and vernakalant on action potential and  $\text{Ca}^{2+}$  transient**  
 3 **of hiPSC-aCMs and -vCMs.**
